# Supplementary material for: Genome-Wide Association Study Identifies a Novel Locus Contributing to Type 2 Diabetes Susceptibility in Sikhs of Punjabi Origin From India
Source: PubMed Central journal article supplement — Diabetes. 2013 Apr 16;62(5):1746–55. doi: 10.2337/db12-1077 (PMC3636649; doi:10.2337/db12-1077), 2013-04-16
Supplement: supp_db12-1077_DB121077SupplementaryData.pdf [file supp_db12-1077_DB121077SupplementaryData.pdf]

## SUPPLEMENTARY DATA

### South Asian Studies

#### Asian Indian Diabetic Heart Study/Sikh Diabetes Study (Discovery)

Our primary Punjabi Sikh cohort (discovery and replication) used in this study is comprised of 4,510 individuals (2,553 cases 1,957 controls) and is part of the Asian Indian Diabetic Heart Study or Sikh Diabetes Study (AIDHS/SDS) [1, 2]. The Punjabi Sikh population has unique characteristics that are ideal for genetic studies. Sikhs are strictly a non-smoking population and about 50% of participants are life-long vegetarians. All individuals of Stage 1 (discovery) cohort (N=1,616) for GWAS were recruited from one geographical location. Diagnosis of type 2 diabetes (T2D) was confirmed in all the participants by scrutinizing medical records for symptoms, use of medication, and measuring fasting glucose levels following the guidelines of the American Diabetes Association [3]. Impaired fasting glucose (IFG) is defined as a fasting blood glucose level  $\geq 100$  mg/dL (5.6 mmol/L) but  $\leq 126$  mg/dL (7.0 mmol/L). Impaired glucose tolerance (IGT) is defined as a 2h OGTT  $>140$  mg/dL (7.8 mmol/L) but  $<200$  mg/dL (11.1 mmol/L). Participants with IFG or IGT were considered pre-diabetics and were excluded. The selection of controls was based on a fasting glycemia  $< 100.8$  mg/dL ( $<5.6$  mmol/L) or a 2h glucose  $<141.0$  mg/dL ( $<7.8$  mmol/L) and were clinically free of T2D, IGT or IFG. Lipid, insulin and glucose and anthropometric measurements (height, weight, waist and hip circumference), education, socio-economic status, job grade, dietary and physical activity are available on  $>95\%$  of the AIDHS/SDS individuals selected for this study. Dietary questions involving alcohol consumption were scored using a scale from 0-5, details are described elsewhere[1]. Participants with type I diabetes, or those having a family member with type I diabetes, or rare forms of T2D sub-types (maturity onset diabetes of young or MODY, or secondary diabetes (from e.g. hemochromatosis, pancreatitis) were excluded from the study. All participants signed a written informed consent for the investigations. The study was reviewed and approved by the University of Oklahoma Health Sciences Center's Institutional Review Board, as well as the Human Subject Protection Committees at the participating hospitals and institutes in India.

#### AIDHS/SDS (Replication)

Our in-house replication cohort was part of AIDHS/SDS comprising a total of 2,894 individuals (1,711 T2D cases and 1,183 controls). The vast majorities (87%) of these participants belongs to the State of Punjab and were originally from the same geographic location as the discovery (GWAS) cohort. The details of diagnosis of T2D and other recruitment details are explained above under AIDHS/SDS GWA cohort details and as described elsewhere [1].

#### London Life Sciences Population study (LOLIPOP)

The LOLIPOP study is a population-based cohort of South Asian and European men and women aged 35-75 years living in West London [4]. Participants were recruited from the lists of 58 GPs between 2002 and 2008. South Asians were of self-reported South Asian ancestry, and were recruited to the study if all 4 grandparents were born in the Indian Subcontinent (countries of India, Pakistan, Sri Lanka or Bangladesh). Data on medical history, family history, current prescribed medication, cardiovascular risk factors, and alcohol intake and leisure-time physical activity were obtained by a trained research nurse using an interviewer-administered questionnaire. Country of birth of participants, parents, and grandparents were recorded together with language and religion, for assignment of ethnic subgroups. Physical

## SUPPLEMENTARY DATA

measurements included blood pressure (mean of 3 readings, taken with an Omron 705CP), height, weight, waist and hip circumference, and 12 lead ECG. Blood was collected after an 8 hour fast for plasma glucose, total and HDL cholesterol, triglycerides, insulin and high sensitivity C-reactive protein. T2D was defined as physician diagnosis on treatment or fasting glucose  $\geq 7.0$  mmol/L. Controls had no history of T2D, and had fasting glucose  $< 7$  mmol/L. All participants gave written informed consent, and the study was approved by the Local Research Ethics Committee.

### **Pakistan Risk of Myocardial Infarction Study (PROMIS)**

PROMIS is an ongoing case-control study of acute myocardial infarction (MI) and other cardiometabolic traits in urban Pakistan [5], which, as of October 2010, included  $\sim 7,500$  MI cases and  $\sim 7,500$  controls. MI cases have typical ECG changes, a positive troponin test, and MI symptoms within the previous 24 hours. Controls are frequency-matched to cases by sex and age (in 5 year bands) and are visitors of patients attending the out-patient department, patients attending the out-patient department for routine non-cardiac complaints, or non-blood related visitors of index MI cases. Non-fasting blood samples were collected from each participant; for MI cases this was within 24 hours of symptom onset. T2D was diagnosed based on physician diagnosis, prior use of oral hypoglycemics, and/or HbA1c  $> 6.5\%$ . Controls had no history of T2D, and had HbA1c  $< 6.0\%$ . All laboratory analyses were conducted centrally at the Center for Non-Communicable Diseases (CNCD), Pakistan. PROMIS has been approved by the research ethics committee of the CNCD, Pakistan, and research ethics committee of each of the institutions involved in participant recruitment.

### **Risk Assessment of Cerebrovascular Events Study (RACE)**

RACE is a retrospective case-control study designed to identify and evaluate genetic, lifestyle and biomarker determinants of stroke and its subtypes in Pakistan. Samples were recruited from six hospital centres in Pakistan. Cases were eligible for inclusion in the study if they: (1) were aged at least 18 years; (2) presented with a sudden onset of neurological deficit affecting a vascular territory with sustained deficit at 24 hours verified by medical attention within 72 hours after onset (onset is defined by when the patient was last seen normal and not when found with deficit); (3) the diagnosis was supported by CT/MRI; and (4) presented with a Modified Rankin Score of  $< 2$  prior to the stroke. TOAST and Oxfordshire classification systems were used to sub-phenotype all stroke cases. T2D was diagnosed based on physician diagnosis, prior use of oral hypoglycemics, and/or HbA1c  $> 6.5\%$ . Controls for T2D in RACE had no history of T2D, and had HbA1c  $< 6.0\%$ .

### **Singapore Indian Eye Study (SINDI)**

SINDI is a population-based, cross-sectional study of 3,400 men and women of South Asian ancestry (self reported), living in the South-Western part of Singapore, recruited as part of the Singapore Indian Chinese Cohort Eye Study. Age stratified random sampling was used to select 6,350 eligible participants, of which 3,400 participated in the study (75.6% response rate). Detailed methodology has been published [6]. T2D cases and controls were selected from the population based cross sectional study where T2D was defined as either a history of diabetes or HbA1c level more than 6.5%. Controls had no history of diabetes and HbA1c level  $< 6.0\%$ . This yielded 977 Indian T2D cases and 1,169 controls.

## SUPPLEMENTARY DATA

### **Chennai Urban Rural Epidemiology Study (CURES)**

CURES is an ongoing epidemiology study of a representative sample of 26,001 South Asians in Chennai, the fourth largest city in India (population ~5 million), recruited using a random sampling technique[7]. T2D was defined as self-reported diabetes on drug treatment, fasting glucose  $\geq 7.8$  or post-load glucose  $\geq 11.1$ . Controls were selected as people with no history of T2D, fasting glucose  $< 6.1$  mmol/L and 2-hour glucose  $< 7.8$  mmol/L. Written informed consent was obtained from all study subjects, and the protocol was approved by the Institutional Ethics Committee of the Madras Diabetes Research Foundation.

### **Diabetes Genetics in Pakistan (DGP) study**

Indigenous Pakistani subjects were recruited in collaboration with Baqai Institute of Diabetology and Endocrinology (BIDE), Karachi, Pakistan [8]. Subjects with T2D (physician diagnosed, on treatment) were recruited either from hospitals within Mirpur District or from specifically organized Diabetes Awareness camps. Control subjects were recruited from community screening camps set up throughout Mirpur District. Normal glucose tolerance was defined as fasting whole blood glucose  $\leq 5.6$  mmol/L. Genomic DNA was extracted from saliva using the Oragene<sup>®</sup> DNA sample collection kit and extraction protocol (DNA Genotek Inc., Ontario, Canada). Informed consent was obtained from all study participants and the study was approved by the BIDE Institutional Review Board.

### **United Kingdom Asian Diabetes Study (UKADS)**

UK-resident South Asian subjects with T2D (physician diagnosed, on treatment) were recruited to UKADS from Birmingham and Coventry, UK [9]. All subjects were of Punjabi ancestry, confirmed over three generations, and originated predominantly from the Mirpur region of Azad Kashmir, Pakistan. Ethnically-matched control subjects were recruited from the same geographical areas through community screening. Normal glucose tolerance was defined as either fasting plasma glucose  $< 6.1$  mmol/L and 2hr plasma glucose  $< 7.8$  mmol/L on a 75g OGTT (where possible) or random blood glucose  $< 7$  mmol/L. Genomic DNA was extracted from venous blood using the Nucleon<sup>®</sup> protocol (Nucleon Biosciences, Coatbridge, UK). Informed consent was obtained from all study participants and the study was approved by the Birmingham East, North and Solihull Research Ethics Committee.

### **Sri Lankan Diabetes Studies**

Control subjects were participants in the Sri Lankan Diabetes Cardiovascular Study (SLDCS), a cross-sectional nationally-representative epidemiological investigation which recruited 4,388 subjects (40% male) [10]. Among recruited subjects, 3,372 had normal glucose tolerance based on the results of a 75g oral glucose tolerance test (OGTT), interpreted using ADA and WHO criteria. DNA collection was only initiated midway through the SLDCS collection, limiting the number of control samples available for genotyping in the present study to 1,613. The mean (SD) age at diagnosis for this group was 44.8 years (14.5) years and the mean BMI was 21.3 (4.0)  $\text{kgm}^{-2}$  [11]. T2D cases were derived from the Sri Lankan Young Diabetes Study (SLYDS). A total of 1,001 patients with early onset diabetes (42.1% male) were recruited from the three largest hospitals in Sri Lanka in 2005-2006. All patients had been diagnosed with diabetes between the ages of 16

## SUPPLEMENTARY DATA

and 40 and were  $\leq 45$  years when they first joined the study. On the basis of clinical history (independence from insulin for at least 6 months after diagnosis), biochemistry and immunological testing (absence of anti-GAD antibodies) and exclusion for mitochondrial diabetes (mt3243 A>G) [11], 879 were considered to have clinical T2D and available for inclusion in this study. The mean (SD) age at diagnosis for this group was 37.3 (5.2) years and the mean BMI was 24.9 (3.9)  $\text{kgm}^{-2}$ . Genotyping was performed using Applied Biosystems TaqMan<sup>®</sup> SNP genotyping assays on an Applied Biosystems 7900HT system.

### **East Asian Replication Studies**

#### **Bio Bank Japan**

The BioBank Japan Project aims to gather basic information for personalized medicine. GWAS data are available on 4,878 individuals with T2D and 3,345 controls using Illumina HumanHap610-Quad and 550K BeadChip, respectively. We then selected 7,541 subjects belonging to the Hondo cluster (4,470 cases and 3,071 controls) for an association study with T2D. We performed genome-wide imputation by using IMPUTE (<https://mathgen.stats.ox.ac.uk/impute/impute.html>) with data from 89 HapMap samples (44 JPT and 45 CHB in HapMap phase 2)[12]. T2D cases were selected from individuals registered as having T2D. Control groups were individuals registered as not having T2D but affected by other illnesses, or healthy volunteers.

#### **RIKEN T2D study**

We selected another 5,339 T2D cases from the BioBank Japan or from subjects with T2D who visited outpatient clinics at one of 4 different institutions: St. Marianna University School of Medicine, Kawasaki Medical School, Toyama University Hospital; or the Shiga University of Medical Science. We also examined 2,141 controls enrolled during an annual health check-up at Keio University, St. Marianna University School of Medicine; or Toyama University Hospital. Diabetes was diagnosed according to World Health Organization (WHO) criteria. We excluded individuals who were positive for antibody to glutamic acid decarboxylase (GAD) or those with diabetes due to (1) liver dysfunction, (2) steroids and other drugs that might raise glucose levels, (3) malignancy, or (4) a monogenic disorder known to cause diabetes [13].

#### **AGEN Consortium**

##### **Korea Association Resource Study (KARE)**

The KARE study was initiated in 2007 to undertake a large scale GWA analysis for T2D and numerous complex quantitative traits amongst the 10,038 participants (aged between 40 and 69) of the Ansung (N=5,018) and Ansan (N=5,020) population-based cohorts. About 10,000 subjects from KARE study cohorts were genotyped with Affymetrix Genome-Wide Human SNP array 5.0. Two KARE study cohorts were established as part of the Korean Genome Epidemiology Study (KoGES) in 2001. The sampling base for both cohorts is in KyungGi-Do province, close to Seoul, the capital of the Republic of Korea. Both cohorts were designed to allow longitudinal prospective study and adopted the same investigational strategy. Participants have been examined every two years since baseline (2001). More than 260 traits have been extensively examined through epidemiological surveys, physical examinations, and laboratory tests applied to Ansung and Ansan

## SUPPLEMENTARY DATA

cohort members. Among a total of 10,038 KARE study participants, 1,042 subjects were included as T2D cases according to the following criteria: (1) treatment of T2D, (2) fasting plasma glucose  $\geq 7$  mmol/L or plasma glucose 2-h after ingestion of 75g oral glucose load  $\geq 11.1$  mmol/L and (3) age of disease onset  $\geq 40$  years. About 10,000 (1,042 T2D cases and 8,958 controls) participants from KARE study cohorts were genotyped with Affymetrix Genome-Wide Human SNP array 5.0.

### **Singapore Diabetes Cohort Study (SDCS)/Singapore Prospective Study Program (SP2)**

T2D cases were selected from The Singapore Diabetes Cohort Study (SDCS). SDCS is a research initiative to identify genetic and environmental risk factors for diabetic complications. Since 2004, all T2D patients seen at participating polyclinics and hospitals were invited to be part of the cohort. Questionnaire data as well as clinical data of consenting patients were obtained together with bio-specimens such as blood and urine archived at  $-80^{\circ}\text{C}$ . For the purpose of this study, 2,202 Chinese subjects were available for genome-wide analysis [14]. T2D controls were selected from The Singapore Prospective Study Program (SP2). From 2003–2007, participants were invited to participate by linking their unique national identification numbers with national registries, where 7,742 attended the interview and of these 7,742 participants, 5,163 attended the clinical examination. A total of 5,499 Chinese, 1,405 Malays and 1,138 Asian-Indians were available at the time of the study and only the Chinese were used for this study. Detailed population selection and methodology have been previously reported [14, 15]. Controls were individuals with no prior history of diabetes and had a fasting glucose level of not more than 6.0 mmol/L.

### **Singapore Malay Eye Study (SiMES)**

The Singapore Malay Eye Study (SiMES) is a population-based, cross-sectional study of Malay adults, aged 40 – 80 years living in Singapore (N=3,280). Of the 4,168 eligible participants invited, 3,280 participated in the study with a 78.7% response rate. Briefly, age-stratified random sampling of all Malay adults aged from 40–80 years residing in 15 residential districts in the southwestern part of Singapore was performed. Details of the study participants and methods have been published previously [14, 16]. For the SiMES study, 3,072 samples from the population based study were genotyped on the Illumina HumanHap 610Quad. Diabetic cases were defined as having either a history of diabetes or had HbA1c level  $\geq 6.5\%$ . Controls had no history of diabetes and HbA1c level  $< 6\%$ . This yielded 794 Malay diabetic cases with 1,240 controls.

### **Cardiometabolic Genome Epidemiology (CAGE) Network**

In the case-control panel of the CAGE Network, T2D cases (N=1,110) were enrolled according to the 1999 WHO criteria, while unaffected controls (N=1,014) were enrolled according to the following criteria: (1) no past history of urinary glucose or glucose intolerance; (2) HbA1c,  $< 5.6\%$  or a normal glucose (75g) tolerance test; and (3) age at examination,  $\geq 55$  years. In addition, population-based subjects (740 cases and 4,889 controls from the CAGE-Fukuoka Study) and the Biobank Japan (<http://biobankjp.org/>) cases (N=3,403, BBJ samples independent of those used for the stage-2 analysis) were included in this case-control study. In the CAGE-Fukuoka Study (12,569 participants in total), diabetes was defined as HbA1c  $\geq 7.0\%$  or under treatment of diabetes; the controls were chosen as nondiabetic subjects who met the

## SUPPLEMENTARY DATA

following conditions: age,  $\geq 55$  years; HbA1c,  $\leq 5.0\%$ ; no previous and/or current treatment for diabetes; and absence of renal failure (serum creatinine,  $< 3.0$  mg/dL), as previously described [17].

### **Shanghai Diabetes Genetic Study (SDGS)**

The SDGS includes genome wide scan data of 1,019 diabetes case and 1,710 controls. Details of the study design have been described elsewhere [18]. Briefly, diabetes cases in the SDGS included 886 incident T2D cases identified in the Shanghai Women's Health Study (SWHS)[19], a population-based cohort study of 75,000 women, and 133 prevalent T2D cases identified from female controls of the Shanghai Breast Cancer Study (SBCS), a population-based case control study [20]. The 886 diabetes cases identified from the SWHS all met the following criteria: (1) age  $\leq 65$  with a self-reported diabetes diagnosed after study enrollment; (2) used diabetes medication; (3) had fasting glucose level  $> 7$  mmol/L at least twice, and (4) donated a blood sample. The 133 diabetes cases identified from the controls of SBCS were women who were diagnosed with T2D and were on diabetes medication or had a blood glucose level  $> 7$  mmol/L (measured by study). The 1,710 controls used in this GWAS were shared with a GWAS of breast cancer that was recently completed and was based primarily on the Shanghai Breast Cancer Study (SBCS). Excluded from the control group are women who (1) had a self-reported history of diabetes; or (2) had a blood glucose level between 5.5 and 7mmol/L and had HbA1c  $> 6.1\%$  or had no HbA1C data.

### **Taiwan T2D study (TDS)**

A total of 2,798 unrelated individuals with T2D, age  $> 20$  years, were recruited from China Medical University Hospital (CMUH), Taichung, Taiwan; Chia-Yi Christian Hospital (CYCH), Chia-Yi, Taiwan; and National Taiwan University Hospital (NTUH), Taipei, Taiwan. All of the T2D cases were diagnosed according to medical records and fasting plasma glucose levels using American Diabetic Association criteria. Subjects with type 1 diabetes, gestational diabetes, and maturity-onset diabetes of the young (MODY) were excluded from this study. The controls were randomly selected from the Taiwan Han Chinese Cell and Genome Bank. The criteria for controls in the association study were (1) no past diagnostic history of T2D, (2) HbA1c ranging from 3.4% to 6%, and (3) BMI  $\leq 32$  kg/m<sup>2</sup>. The two control groups were comparable with respect to BMI, gender, age at study, and level of HbA1c. All of the participating T2D cases and controls were of Han Chinese origin, which is the origin of 98% of the Taiwan population [21].

### **Cebu Longitudinal Health and Nutrition Survey (CLHNS)**

The CLHNS is a community-based birth cohort study that originally enrolled 3,327 pregnant women from the Metropolitan Cebu, Philippines area in 1983-4 (3,080 singleton live births), and has since followed them and their offspring. For this study of CLHNS mothers, glucose levels were collected in the year 2005, and the study sample consists of 159 T2D cases and 1624 controls. T2D was defined as overnight fasting plasma glucose level  $\geq 7.0$  mmol/L or current use of anti-diabetic medication. Controls were defined as overnight fasting plasma glucose level  $< 7.0$  mmol/L and treatment naive. Whole blood glucose levels were converted to plasma glucose level by subtracting 0.97 mmol/L[22].

## SUPPLEMENTARY DATA

### European Replication Studies

#### DIAbetes Genetics Replication And Meta-analysis (DIAGRAM)

The DIAGRAM consortium is focused on performing large-scale studies to characterize the genetic basis of T2D, with a principal focus on samples of European descent. An incremental meta-analysis (DIAGRAM)+ is comprised of a total of 8,130 cases and 38,987 controls available with GWAS genotyping. T2D case-control status was defined using study-specific criteria. SNP associations were tested using an additive genetic model, and combined across studies by inverse variance meta-analysis using a fixed effects model [23].

### Acknowledgements

#### *Collaborators*

#### **DIAGRAM+ study [23]**

Benjamin F Voight, Laura J Scott, Valgerdur Steinthorsdottir, Andrew P Morris, Christian Dina, Ryan P Welch, Eleftheria Zeggini, Cornelia Huth, Yurii S Aulchenko, Gudmar Thorleifsson, Laura J McCulloch, Teresa Ferreira, Harald Grallert, Najaf Amin, Guanming Wu, Cristen J Willer, Soumya Raychaudhuri, Steve A McCarroll, Claudia Langenberg, Oliver M Hofmann, Josée Dupuis, Lu Qi, Ayellet V Segrè, Mandy van Hoek, Pau Navarro, Kristin Ardlie, Beverley Balkau, Rafn Benediktsson, Amanda J Bennett, Roza Blagieva, Eric Boerwinkle, Lori L Bonnycastle, Kristina Bengtsson Boström, Bert Bravenboer, Suzannah Bumpstead, Noël P Burt, Guillaume Charpentier, Peter S Chines, Marilyn Cornelis, David J Couper, Gabe Crawford, Alex SF Doney, Katherine S Elliott, Amanda L Elliott, Michael R Erdos, Caroline S Fox, Christopher S Franklin, Martha Ganser, Christian Gieger, Niels Grarup, Todd Green, Simon Griffin, Christopher J Groves, Candace Guiducci, Samy Hadjadj, Neelam Hassanali, Christian Herder, Bo Isomaa, Anne U Jackson, Paul RV Johnson, Torben Jørgensen, Wen HL Kao, Norman Klopp, Augustine Kong, Peter Kraft, Johanna Kuusisto, Torsten Lauritzen, Man Li, Aloysius Lieverse, Cecilia M Lindgren, Valeriya Lyssenko, Michel Marre, Thomas Meitinger, Kristian Midthjell, Mario A Morken, Narisu Narisu, Peter Nilsson, Katharine R Owen, Felicity Payne, John RB Perry, Ann-Kristin Petersen, Carl Platou, Christine Proença, Inga Prokopenko, Wolfgang Rathmann, N William Rayner, Neil R Robertson, Ghislain Rocheleau, Michael Roden, Michael J Sampson, Richa Saxena, Beverley M Shields, Peter Shrader, Gunnar Sigurdsson, Thomas Sparsø, Klaus Strassburger, Heather M Stringham, Qi Sun, Amy J Swift, Barbara Thorand, Jean Tichet, Tiinamaija Tuomi, Rob M van Dam, Timon W van Haeften, Thijs van Herpt, Jana V van Vliet-Ostaptchouk, G Bragi Walters, Michael N Weedon, Cisca Wijmenga, Jacqueline Witteman, Richard N Bergman, Stephane Cauchi, Francis S Collins, Anna L Gloyn, Ulf Gyllensten, Torben Hansen, Winston A Hide, Graham A Hitman, Albert Hofman, David J Hunter, Kristian Hveem, Markku Laakso, Karen L Mohlke, Andrew D Morris, Colin NA Palmer, Peter P Pramstaller, Igor Rudan, Eric Sijbrands, Lincoln D Stein, Jaakko Tuomilehto, Andre Uitterlinden, Mark Walker, Nicholas J Wareham, Richard M Watanabe, Goncalo R Abecasis, Bernhard O Boehm, Harry Campbell, Mark J Daly, Andrew T Hattersley, Frank B Hu, James B Meigs, James S Pankow, Oluf Pedersen, H.-Erich Wichmann, Inês Barroso, Jose C Florez, Timothy M Frayling, Leif Groop, Rob Sladek, Unnur Thorsteinsdottir, James F Wilson, Thomas Illig, Philippe Froguel, Cornelia M van Duijn, Kari Stefansson, David Altshuler, Michael Boehnke, Mark I McCarthy.

## SUPPLEMENTARY DATA

### **MuTHER Consortium ([www.muther.ac.uk](http://www.muther.ac.uk))**

Kourosh R. Ahmadi<sup>1</sup>, Chrysanthi Ainali<sup>2</sup>, Amy Barrett<sup>3</sup>, Veronique Bataille<sup>1</sup>, Jordana T. Bell<sup>1,4</sup>, Alfonso Buil<sup>5</sup>, Panos Deloukas<sup>6</sup>, Emmanouil T. Dermizakis<sup>5</sup>, Antigone S. Dimas<sup>4,5</sup>, Richard Durbin<sup>6</sup>, Daniel Glass<sup>1</sup>, Elin Grundberg<sup>1,6</sup>, Neelam Hassanali<sup>3</sup>, Åsa K. Hedman<sup>4</sup>, Catherine Ingle<sup>6</sup>, David Knowles<sup>7</sup>, Sarah Keildson<sup>3</sup>, Maria Krestyaninova<sup>8</sup>, Cecilia M. Lindgren<sup>4</sup>, Christopher E. Lowe<sup>9,10</sup>, Mark I. McCarthy<sup>3,4,11</sup>, Eshwar Meduri<sup>1,6</sup>, Paola di Meglio<sup>12</sup>, Josine L. Min<sup>4</sup>, Stephen B. Montgomery<sup>5</sup>, Frank O. Nestle<sup>12</sup>, Alexandra C. Nica<sup>5</sup>, James Nisbet<sup>6</sup>, Stephen O'Rahilly<sup>9,10</sup>, Leopold Parts<sup>6</sup>, Simon Potter<sup>6</sup>, Magdalena Sekowska<sup>6</sup>, So-Youn Shin<sup>6</sup>, Kerrin S. Small<sup>1,6</sup>, Nicole Soranzo<sup>1,6</sup>, Tim D. Spector<sup>1</sup>, Gabriela Surdulescu<sup>1</sup>, Mary E. Travers<sup>3</sup>, Loukia Tsaprouni<sup>6</sup>, Sophia Tsoka<sup>2</sup>, Alicja Wilk<sup>6</sup>, Tsun-Po Yang<sup>6</sup>, Krina T. Zondervan<sup>4</sup>

Institutions

1. Department of Twin Research and Genetic Epidemiology, King's College London, London, UK
2. Department of Informatics, School of Natural and Mathematical Sciences, King's College London, Strand, London, UK
3. Oxford Centre for Diabetes, Endocrinology & Metabolism, University of Oxford, Churchill Hospital, Oxford, UK
4. Wellcome Trust Centre for Human Genetics, University of Oxford, Oxford, UK
5. Department of Genetic Medicine and Development, University of Geneva Medical School, Geneva, Switzerland
6. Wellcome Trust Sanger Institute, Wellcome Trust Genome Campus, Hinxton, UK
7. University of Cambridge, Cambridge, UK
8. European Bioinformatics Institute, Hinxton, UK
9. University of Cambridge Metabolic Research Labs, Institute of Metabolic Science Addenbrooke's Hospital Cambridge, UK
10. Cambridge NIHR Biomedical Research Centre, Addenbrooke's Hospital, Cambridge, UK
11. Oxford NIHR Biomedical Research Centre, Churchill Hospital, Oxford, UK
12. St. John's Institute of Dermatology, King's College London, London, UK
13. Asian

### **Genetic Epidemiology Network (AGEN) +consortium [24]**

Yoon Shin Cho, Chien-Hsiun Chen, Cheng Hu, Jirong Long, Rick Twee Hee Ong, Xueling Sim, Fumihiko Takeuchi, Ying Wu, Min Jin Go, Toshimasa Yamauchi, Yi-Cheng Chang, Soo Heon Kwak, Ronald C W Ma, Ken Yamamoto, Linda S Adair, Tin Aung, Qiuyin Cai, Li-Ching Chang, Yuan-Tsong Chen, Yutang Gao, Frank B Hu, Hyung-Lae Kim, Sangsoo Kim<sup>21</sup>, Young Jin Kim, Jeannette Jen-Mai Lee, Nanette R Lee, Yun Li, Jian Jun Liu, Wei Lu, Jiro Nakamura, Eitaro Nakashima, Daniel Peng-Keat Ng, Wan Ting Tay, Fuu-Jen Tsai, Tien Yin Wong, Mitsuhiro Yokota, Wei Zheng, Rong Zhang, Congrong Wang, Wing Yee So, Keizo Ohnaka, Hiroshi Ikegami, Kazuo Hara, Young Min Cho, Nam H Cho, Tien-Jyun Chang<sup>11</sup>, Yuqian Bao, Åsa K Hedman, Ryoichi Takayanagi, Kyong Soo Park, Weiping Jia, Lee-Ming Chuang, Juliana C N Chan, Shiro Maeda, Takashi Kadowaki, Jong-Young Lee, Jer-Yuarn Wu, Yik Ying Teo, E Shyong Tai, Xiao Ou Shu, Karen L Mohlke, Norihiro Kato, Bok-Ghee Han & Mark Seielstad



## SUPPLEMENTARY DATA

### ***Funding and Resources***

#### **London Life Sciences Population study (LOLIPOP)**

The LOLIPOP study is supported by the National Institute for Health Research (NIHR) Comprehensive Biomedical Research Centre Imperial College Healthcare NHS Trust, the British Heart Foundation (SP/04/002), the Medical Research Council (G0700931), the Wellcome Trust (084723/Z/08/Z) and the NIHR (RP-PG-0407-10371). We thank the participants and research staff who made the study possible.

#### **Pakistan Risk of Myocardial Infarction Study (PROMIS) and Risk Assessment of Cerebrovascular Events Study (RACE)**

Genotyping in PROMIS was supported by the Wellcome Trust. Some core support to PROMIS was provided by the British Heart Foundation. HbA1c assays were supported by the Center for Non-Communicable Diseases and Addenbrookes Hospital Charitable Trust. DS was supported by a Yousef Jameel Foundation fellowship. Fieldwork in the RACE study was partly supported by a grant from the National Institute of Neurological Disorders (NINDS) and Fogarty (1R21NS064908-01). The Cardiovascular Epidemiology Unit at the University of Cambridge is underpinned by grants from the British Heart Foundation and the Medical Research Council. We would like to acknowledge the contributions of the following individuals: Usman Ahmad, Abdul Hakeem, Nadeem Qamar, Azhar Faruqui, Rashid Jooma, Jawaid Hassan Niazi,, Abdul Ghaffar, Kishwar Kumar, Aftab Alam Gul, Junaid Zafar, Faisal Shahid, Shahzad Majeed Bhatti, Syed Saadat Ali, Syed Shazad Hussain, Madad Ali Ujjan, Asghar Ali, Ayaz Ali, Mir Alam, Hassan Zaib, Abdul Ghafoor, Saeed Ahmed, Muhammad Riazuddin, Muhammad Irshad Javed, Jabir Furqan, Abdul Ghaffar, Muhammad Shahid, Tanveer Baig Mirza, Muhammad Naeem, Afzal Hussain, Muhammad Khurram Shahzad, Khowaja Muhammad Shoaib, Muhammad Imran Nisar, Altaf Hussain, Waleed Kayani, Muhammad Shazad, Mehmood Jafree, Asad Ali Shah, Inosh Hasan, Sarfaraz Sher Ali, Touqeer Ahmed, Matthew Walker, Sarah Watson, Sana Nasim, Muhammad Ahsan Javed, Muhammad Zuhair Yusuf, Muhammad Zafar, Shajjia Razi Haider, Stephen Kaptoge and Nadeem Sarwar, Ayesha Kamal, Nasir Sheikh, Nabi Shah, Maria Samuel, Adam Butterworth, Hassan Khan, Moazzam Zaidi, Usman Ahmad, Stephen Kaptoge, Nadeem Sarwar, Abdul Hakeem, Nadeem Qamar, Azhar Faruqui, Rashid Jooma, Jawaid Hassan Niazi,, Abdul Ghaffar, Kishwar Kumar, Aftab Alam Gul, Junaid Zafar, Faisal Shahid, Shahzad Majeed Bhatti, Syed Saadat Ali, Syed Shazad Hussain, Madad Ali Ujjan, Asghar Ali, Ayaz Ali, MirAlam, Hassan Zaib, Abdul Ghafoor, Saeed Ahmed, Muhammad Riazuddin, MuhammadIrshad Javed, Jabir Furqan, Abdul Ghaffar, Muhammad Shahid, Tanveer Baig Mirza, Muhammad Naeem, Afzal Hussain, Muhammad Khurram Shahzad, Khowaja Muhammad Shoaib, Muhammad Imran Nisar, Altaf Hussain, Waleed Kayani, Muhammad Shazad, Mehmood Jafree, Asad Ali Shah, Inosh Hasan, Sarfaraz Sher Ali, Touqeer Ahmed, Matthew Walker, Sarah Watson, Sana Nasim, Muhammad Ahsan Javed, Muhammad Zuhair Yusuf, Muhammad Zafar, Shajjia Razi Haider, Kashif Saleheen and Hannah Lombardi.

#### **United Kingdom Asian Diabetes Study**

We would like to thank all the diabetic patients and control subjects for agreeing to participate in this study. We are grateful to Shanaz Mughal, Kam Johal, Dr. Anthony Dixon, Dr. Sri Bellary and Tahera Mehrali for recruiting the study subjects and coordinating data collection. The United Kingdom Asian Diabetes Study was conceived and managed by Professor Anthony Barnett, Professor Sudhesh Kumar and Dr Paul O'Hare and was supported by Pfizer, Sanofi-Aventis, Servier Laboratories UK, Merck Sharp & Dohme/Schering-Plough, Takeda UK,

## SUPPLEMENTARY DATA

Roche, Merck Pharma, Daiichi-Sankyo UK, Boehringer Ingelheim, Eli Lilly, Novo Nordisk, Bristol-Myers Squibb, Solvay Health Care and Assurance Medical Society UK.

### **Diabetes Genetics in Pakistan study**

We would like to thank all the diabetic patients and control subjects for agreeing to participate in this study. We are grateful to Dr. Asher Fawwad, Dr. Waheed Iqbal and Dr. Abdul Razzaq for recruiting the study subjects and coordinating data collection. We are particularly grateful to Dr. Muhammad Zafar Iqbal Hydrie for overseeing the DGP collection and for the assistance of Prof. A. Samad Shera in setting up collaborative links between the UK and Pakistan. Funding for the collection of DNA and clinical data was provided by Diabetes UK (project number 07/0003512).

### **RIKEN/ Bio Bank Japan**

For RIKEN T2D study, we thank Dr. Minoru Iwata at First Department of Internal Medicine, University of Toyama for providing DNA samples and clinical information. We also thank the technical staff of the Laboratory for Endocrinology and Metabolism at the RIKEN Center for Genomic Medicine for providing technical assistance. Japanese studies were supported by a grant from Ministry of Education, Culture, Sports, Science, and Technology, Japan.

### **The Singapore Indian Eye Study (SINDI)**

The Singapore Indian Eye Study (SINDI) was funded by grants from Biomedical Research Council of Singapore (BMRC 09/1/35/19/616 and BMRC 08/1/35/19/550) and National Medical Research Council of Singapore (NMRC/STaR/0003/2008).

### **Singapore Prospective Study Program (SP2)**

The Singapore Prospective Study Program (SP2) was funded through grants from the Biomedical Research Council of Singapore (BMRC 05/1/36/19/413 and 03/1/27/18/216) and the National Medical Research Council of Singapore (NMRC/1174/2008).

### **The Singapore Malay Eye Study (SiMES)**

The Singapore Malay Eye Study (SiMES) was funded by the National Medical Research Council (NMRC 0796/2003, IRG07nov013, and NMRC/STaR/0003/2008) and Biomedical Research Council (BMRC, 09/1/35/19/616).

SUPPLEMENTARY DATA

**Supplementary Table 1 .** Stage 1 Discovery and Stage 2 Replication Cohorts (N=33,592)

| Study                     | Ethnic Group | Replication Stage | Replication | Cases (N) | Controls (N) | Total |
|---------------------------|--------------|-------------------|-------------|-----------|--------------|-------|
| AIDHS/SDS GWAS            | Punjabi Sikh | Discovery Stage 1 | --          | 842       | 774          | 1616  |
| LOLIPOP                   | Punjabi Sikh | Stage 2a          | Look-up     | 801       | 2018         | 2819  |
| LOLIPOP                   | South Asian  | Stage 2b          | Look-up     | 982       | 1742         | 2724  |
| PROMIS                    | South Asian  | Stage 2b          | Look-up     | 1765      | 5267         | 7032  |
| PROMIS GWAS1 <sup>a</sup> | South Asian  | Stage 2b          | Look-up     | 2110      | 5236         | 7346  |
| PROMIS GWAS2 <sup>b</sup> | South Asian  | Stage 2b          | Look-up     | 2995      | 2711         | 5706  |
| PROMIS GWAS3 <sup>c</sup> | South Asian  | Stage 2b          | Look-up     | 1533      | 1194         | 2727  |
| RACE GWAS 1 <sup>d</sup>  | South Asian  | Stage 2b          | Look-up     | 503       | 510          | 1013  |
| RACE GWAS 2 <sup>e</sup>  | South Asian  | Stage 2b          | Look-up     | 1083      | 1526         | 2609  |

PROMIS/RACE sub-components of Punjabi origin: <sup>a</sup> 641 cases/1466 controls; <sup>b</sup> 1259 cases/1074 controls; <sup>c</sup> 669 cases/484 controls; <sup>d</sup> 164 cases/129 controls; <sup>e</sup> 523 cases/775 controls

SUPPLEMENTARY DATA

**Supplementary Table 2.** Stage 3 Replication Cohorts (N= 85,638)

| Study                        | Ethnic Group        | Replication Stage | Replication | Cases (N) | Controls (N) | Total |
|------------------------------|---------------------|-------------------|-------------|-----------|--------------|-------|
| AIDHS/SDS Replication cohort | Punjabi Sikhs       | Stage 3a          | Genotyped   | 1711      | 1183         | 2894  |
| CURES                        | South Indians       | Stage 3b          | Genotyped   | 1164      | 1163         | 2327  |
| SINDI                        | South Indians       | Stage 3b          | Look-up     | 974       | 1165         | 2139  |
| UKADS                        | UK Pakistani        | Stage 3b          | Genotyped   | 827       | 438          | 1265  |
| DGP                          | Pakistani           | Stage 3b          | Genotyped   | 1313      | 1281         | 2594  |
| SLDS                         | Sri Lankan          | Stage 3b          | Genotyped   | 879       | 1613         | 2492  |
| RIKEN/Bio Bank               | Japanese            | Stage 3c          | Look-up     | 4455      | 2955         | 7410  |
| RIKEN/Bio Bank               | Japanese            | Stage 3c          | Genotyped   | 5339      | 2141         | 7480  |
| AGEN                         | East Asians         | Stage 3c          | Look-up     | 6952      | 11865        | 18817 |
| DIAGRAM <sup>+</sup>         | European Caucasians | Stage 3d          | Look-up     | 8130      | 38987        | 47117 |

SUPPLEMENTARY DATA

**Supplementary Table 3.** Clinical Characteristics of Stage 1 discovery and Stage 2 replication samples

|                          | SDS Sikh     |              | LOLIPOP Sikh |              | LOLIPOP other South Asian |              | PROMIS South Asian |              |
|--------------------------|--------------|--------------|--------------|--------------|---------------------------|--------------|--------------------|--------------|
|                          | NG Controls  | T2D          | NG Controls  | T2D          | NG Controls               | T2D          | NG Controls        | T2D          |
| Age                      | 51.6 (14.0)  | 54.0 (10.4)  | 52.4 (10.9)  | 59.5 (9.3)   | 54.3 (10.6)               | 59.2 (9.2)   | 52.9 (10.5)        | 55.0 (9.3)   |
| Gender (%males)          | 51.0         | 53.0         | 82.7         | 83           | 85.5                      | 82.8         | 83.0               | 76.0         |
| SYBP (mmHg)              | 135.4 (22.9) | 145.3 (23.1) | 133.0 (19.5) | 142.5 (20.4) | 131.5 (18.1)              | 139.0 (20.2) | 126.0 (19.9)       | 128.1 (20.3) |
| DYSBP (mmHg)             | 81.7 (12.8)  | 85.4 (12.3)  | 82.9 (11.0)  | 81.8 (11.2)  | 81.0 (10.3)               | 79.8 (10.6)  | 80.3 (11.2)        | 80.7 (11.3)  |
| Weight (kg)              | 69.3 (14.5)  | 70.3 (13.9)  | 75.9 (12.9)  | 79.4 (13.8)  | 73.3 (12.5)               | 77.0 (14.2)  | NA                 | NA           |
| BMI (kg/m <sup>2</sup> ) | 26.3 (5.0)   | 27.3 (5.0)   | 26.6 (4.0)   | 28.3 (4.4)   | 26.3 (4.1)                | 27.9 (4.8)   | 25.3 (4.4)         | 26.0 (4.4)   |
| Waist (cm)               | 91.9 (12.7)  | 94.8 (11.7)  | 96.4 (10.8)  | 101.6 (11.4) | 95.0 (10.7)               | 100.2 (11.5) | 90.1 (11.8)        | 92.3 (12.0)  |
| WHR                      | 0.94 (0.07)  | 0.96 (0.07)  | 0.95 (0.07)  | 0.99 (0.07)  | 0.95 (0.07)               | 0.99 (0.07)  | 0.94 (0.06)        | 0.95 (0.06)  |
| FBG (mmol/L)             | 5.3 (0.7)    | 9.6 (3.8)    | 4.9 (0.5)    | 8.1 (3.2)    | 5.0 (0.4)                 | 8.2 (3.2)    | NA                 | NA           |
| Cholesterol (mmol/L)     | 4.8 (1.4)    | 4.7 (1.3)    | 5.3 (1.1)    | 4.7 (1.1)    | 5.1 (1.1)                 | 4.6 (1.2)    | 4.8 (1.3)          | 4.8 (1.4)    |
| HDL (mmol/L)             | 1.1 (0.4)    | 1.0 (0.3)    | 1.2 (0.3)    | 1.1 (0.3)    | 1.2 (0.3)                 | 1.1 (0.3)    | 0.9 (0.3)          | 0.9 (0.3)    |
| LDL (mmol/L)             | 2.9 (1.1)    | 2.8 (1.0)    | 3.2 (0.9)    | 2.7 (0.9)    | 3.2 (0.9)                 | 2.6 (1.0)    | 3.0 (1.1)          | 3.0 (1.2)    |
| TG (mmol/L)              | 1.9 (1.2)    | 2.1 (1.4)    | 1.5 (1.0)    | 1.6 (1.2)    | 1.4 (1.0)                 | 1.6 (1.2)    | 0.6 (0.6)          | 0.8 (0.6)    |
|                          |              |              |              |              |                           |              |                    |              |

SYBP- systolic blood pressure, DYSBP-diastolic blood pressure, BMI-body mass index, WHR-waist to hip ratio, FBG-fasting blood glucose, HDL-high density lipoprotein cholesterol, LDL-low density lipoprotein cholesterol, TG-triglyceride

SUPPLEMENTARY DATA

**Supplementary Table 4. Clinical Characteristics of Stage 3 replication samples**

|                    | Location  | Replication      | Group    | n    | Male | Age       | BMI                  | Age of      | FBG     | CAD  | HTN  | SBP         | DBP        | Waist      | Hip       | Weight     | Height     | Total Chol | HDL     | LDL      | TG      |
|--------------------|-----------|------------------|----------|------|------|-----------|----------------------|-------------|---------|------|------|-------------|------------|------------|-----------|------------|------------|------------|---------|----------|---------|
|                    |           |                  |          |      | (%)  | (yrs)     | (kg/m <sup>2</sup> ) | onset (yrs) | mmol/L  | (%)  | (%)  | (mmHg)      | (mmHg)     | (cm)       | (cm)      | (kg)       | (cm)       | mmol/L     | mmol/L  | mmol/L   | mmol/L  |
| <b>South Asian</b> |           |                  |          |      |      |           |                      |             |         |      |      |             |            |            |           |            |            |            |         |          |         |
| AIDHS/SDS          | India     | <i>genotype</i>  | Cases    | 1711 | 56   | 55.3±11.9 | 27.2±4.7             | 46.9±12.4   | 9.5±4.0 | 23.9 | 27.1 | 142.9±24.5  | 84.1±12.3  | 94.1±13.9  | 98.2±12.5 | 72.8±16.8  | 162.3±9.8  | 4.8±1.2    | 1.1±0.4 | 2.8±1.1  | 2.0±1.3 |
|                    |           |                  | Controls | 1183 | 58   | 46.0±14.2 | 26.0±5.1             | NA          | 5.3±0.6 | 20.9 | 14.4 | 129.8±35.5  | 80.3±11.5  | 86.5±17.3  | 95.5±16.5 | 72.5±20.5  | 163.9±9.6  | 4.9±2.1    | 1.1±0.4 | 3.1±1.0  | 1.7±1.1 |
| SINDI South Asian  | Singapore | <i>in silico</i> | Cases    | 974  | 54   | 60.7±9.8  | 27.1±5.1             | 51.4±10.6   | NA      | 10.0 | 57.0 | 139.9±19.7  | 77.1±10.1  | NA         | NA        | 73.4±4.2   | 180.1±35.6 | 4.9±1.2    | 1.0±0.3 | 3.0±0.96 | 2.1±1.2 |
|                    |           |                  | Controls | 1165 | 48   | 55.7±9.7  | 25.3±4.4             | NA          | NA      | 3.0  | 25.0 | 131.7±19.2  | 77.2±9.9   | NA         | NA        | 73.6±4.2   | 169.4±31.8 | 5.4±0.9    | 1.1±0.3 | 3.5±0.87 | 1.8±1.1 |
| CURES              | India     | <i>genotype</i>  | Cases    | 1164 | 46   | 52.4±10.8 | 25.5±4.2             | NA          | 9.5±3.9 | NA   | NA   | 130.7±20.5  | 78.1±11.2  | NA         | NA        | NA         | NA         | 5.1±1.1    | 1.1±0.2 | 3.1±0.9  | 1.9±1.1 |
|                    |           |                  | Controls | 1163 | 42   | 46.9±12.2 | 24.4±4.4             | NA          | 4.8±0.5 | NA   | NA   | 114.2±18.5  | 83.9±22.3  | NA         | NA        | NA         | NA         | 4.8±0.9    | 1.1±0.3 | 3.0±0.8  | 1.4±0.7 |
| UKADS              | UK        | <i>genotype</i>  | Cases    | 827  | 54   | 57.0±11.9 | 28.6±4.6             | 49.7±11.8   | NA      | 18.7 | 23.0 | 140.5±20.6  | 83.9±11.0  | 102.5±10.4 | NA        | 77.1±13.0  | NA         | 4.8±1.2    | 1.3±0.5 | 2.4±1.0  | 2.6±2.1 |
|                    |           |                  | Controls | 438  | 48   | 54.9±11.8 | 28.0±4.8*            | NA          | NA      | NA   | 22.3 | 134.9±20.1* | 84.4±11.9* | 99.7±11.4* | NA        | 74.9±13.7* | NA         | NA         | NA      | NA       | NA      |
| DGP                | Pakistan  | <i>genotype</i>  | Cases    | 1313 | 45   | 54.7±11.7 | 25.8±4.5             | 48.5±11.5   | NA      | NA   | 33.8 | 134.8±21.0  | 85.4±11.9  | 97.4±11.7  | NA        | 68.3±13.4  | NA         | 4.9±1.2    | 1.0±0.3 | 2.8±1.1  | 2.4±1.5 |
|                    |           |                  | Controls | 1281 | 47   | 56.5±10.9 | 24.3±5.0             | NA          | 4.8±0.5 | NA   | 25.0 | 128.4±20.5  | 81.5±12.3  | 91.9±13.2  | NA        | 64.5±14.4  | NA         | 4.7±1.1    | 1.2±0.3 | 2.9±1.1  | 1.7±1.0 |
| SLDS               | Sri Lanka | <i>genotype</i>  | Cases    | 879  | 41   | 37.3±5.2  | 24.9±3.9             | 32.4±5.2    | 9.1±3.5 | NA   | 33.3 | 120.0±25.0  | 75.0±16.0  | 88.1±9.3   | 95.8±8.0  | 62.8±12.2  | NA         | 5.0±1.2    | 1.1±0.3 | 3.2±1.0  | 1.7±0.9 |
|                    |           |                  | Controls | 1613 | 43   | 44.8±14.5 | 21.3±4.0             | NA          | 4.8±0.9 | NA   | 14.1 | 125.0±19.0  | 74.0±11.0  | 74.8±10.9  | 87.7±8.7  | 52.1±10.8  | NA         | 5.2±1.1    | 1.2±0.3 | 3.4±0.9  | 1.3±0.7 |
| <b>East Asian</b>  |           |                  |          |      |      |           |                      |             |         |      |      |             |            |            |           |            |            |            |         |          |         |
| SINDI Malays       | Singapore | <i>in silico</i> | Cases    | 782  | 49   | 62.3±9.9  | 27.8±4.9             | 54.4±11.2   | NA      | 5.0  | 59.0 | 153.9±23.5  | 80.3±11.4  | NA         | NA        | 71.6±4.2   | 176.3±35.3 | 5.6±1.3    | 1.3±0.3 | 3.5±1.1  | 1.9±1.5 |
|                    |           |                  | Controls | 1235 | 48   | 56.9±11.4 | 25.1±4.8             | NA          | NA      | 3.0  | 26.0 | 143.7±23.5  | 79.5±11.3  | NA         | NA        | 71.8±4.2   | 160.3±33.0 | 5.6±1.1    | 1.4±0.3 | 3.5±1.0  | 1.4±1.2 |
| SINDI Chinese      | Singapore | <i>in silico</i> | Cases    | 1992 | 50   | 64.3±10.2 | 25.3±3.9             | 53.9±13.2   | NA      | NA   | NA   | NA          | NA         | NA         | NA        | NA         | NA         | NA         | NA      | NA       | NA      |
|                    |           |                  | Controls | 1942 | 42   | 47.2±10.7 | 22.6±3.6             | NA          | 4.7±0.5 | 1.0  | 15.0 | 127.4±18.9  | 76.1±10.7  | 80.1±10.8  | 95.8±9.5  | 60.4±11.8  | 163.3±8.5  | 5.2±0.9    | 1.5±0.4 | 3.1±0.8  | 1.3±0.8 |
| KARE+              | Korea     | <i>in silico</i> | Cases    | 1042 | 51   | 56.4±8.6  | 25.5±3.3             | NA          | 7.0±2.6 | NA   | NA   | 122.3±17.8  | 76.9±11.1  | 86.5±8.2   | 94.3±6.3  | 65.1±10.5  | NA         | 5.2±1.1    | 1.1±0.3 | 3.1±0.9  | 2.4±1.7 |
|                    |           |                  | Controls | 2943 | 46   | 51.1±8.6  | 24.1±2.9             | NA          | 4.5±0.4 | NA   | NA   | 113.4±15.9  | 73.2±10.9  | 81.4±8.6   | 92.8±9.0  | 51.0±9.9   | NA         | 4.8±0.8    | 1.2±0.3 | 2.9±0.8  | 1.6±0.9 |
| RIKEN/Bio Bank     | Japan     | <i>genotype</i>  | Cases    | 5339 | 61   | 62.9±11.5 | 24.3±4.1             | NA          | NA      | NA   | NA   | NA          | NA         | NA         | NA        | NA         | NA         | NA         | NA      | NA       | NA      |
|                    |           |                  | Controls | 2141 | 47   | 49.5±17.0 | 22.4±3.2             | NA          | NA      | NA   | NA   | NA          | NA         | NA         | NA        | NA         | NA         | NA         | NA      | NA       | NA      |
| RIKEN/Bio Bank     | Japan     | <i>in silico</i> | Cases    | 4455 | 68   | 65.8±10.0 | 24.1±3.8             | NA          | NA      | NA   | NA   | NA          | NA         | NA         | NA        | NA         | NA         | NA         | NA      | NA       | NA      |
|                    |           |                  | Controls | 2955 | 54   | 51.9±15.2 | 22.4±3.7             | NA          | NA      | NA   | NA   | NA          | NA         | NA         | NA        | NA         | NA         | NA         | NA      | NA       | NA      |

Abbreviations: AIDHS/SDS-Asian Indian Diabetes Heart Study/Sikh Diabetes Study; UKADS-United Kingdom Asian Diabetes Study; DGP-Diabetes Genetics in Pakistan; KARE-Korean Association Resource; CURES-Madras Diabetes Foundation; SLDS- Sri Lanka Diabetes Study  
 FBG, Fasting Blood Glucose; CAD, Coronary Artery Disease; HTN, Hypertension (>140/90mmHg); SBP, Systolic Blood Pressure; DBP, Diastolic Blood Pressure; HDL, High-Density Lipoprotein; LDL, Low-Density Lipoprotein; TG, Triglyceride  
 \*Data were available for a maximum of 265 samples

SUPPLEMENTARY DATA

**Supplementary Table 5.** Stage 1, 2a and 3a meta-analysis results of 66 SNPs with a new T2D locus in Punjabi Sikhs

| SNP        | Chr | BP        | Gene             | Effect allele | Non-effect allele | Effect Allele Freq(Sikh) | Effect Allele Freq(CEU) | OR(95%CI)                 | P               | Direction | $P_{\text{heterogeneity}}$ |
|------------|-----|-----------|------------------|---------------|-------------------|--------------------------|-------------------------|---------------------------|-----------------|-----------|----------------------------|
| rs7903146  | 10  | 114748339 | <i>TCF7L2</i>    | t             | c                 | 0.31                     | 0.5                     | 1.44 (1.33 - 1.56)        | <b>3.32E-19</b> | +++       | 6.78E-03                   |
| rs9552911  | 13  | 22762657  | <i>SGCG</i>      | a             | g                 | <b>0.07</b>              | <b>0</b>                | <b>0.67 (0.58 - 0.77)</b> | <b>1.82E-08</b> | ---       | 5.58E-01                   |
| rs17053082 | 5   | 155326808 | -                | t             | c                 | <b>0.1</b>               | <b>0.06</b>             | <b>1.49 (1.28 - 1.73)</b> | <b>4.17E-07</b> | +?+       | <b>6.36E-01</b>            |
| rs6426514  | 1   | 226946738 | <i>RHOU</i>      | a             | g                 | <b>0.06</b>              | <b>0.09</b>             | <b>1.51 (1.27 - 1.78)</b> | <b>1.91E-06</b> | ++        | <b>7.81E-05</b>            |
| rs4527850  | 8   | 134266031 | <i>WISP1</i>     | t             | c                 | <b>0.75</b>              | <b>0.73</b>             | <b>1.23 (1.13 - 1.34)</b> | <b>2.34E-06</b> | +++       | <b>1.07E-01</b>            |
| rs623323   | 17  | 646770    | <i>NXN</i>       | t             | c                 | <b>0.15</b>              | <b>0.19</b>             | <b>1.28 (1.15 - 1.42)</b> | <b>3.73E-06</b> | +++       | <b>2.43E-01</b>            |
| rs1470579  | 3   | 187011774 | <i>IGF2BP2</i>   | a             | c                 | <b>0.59</b>              | <b>0.5</b>              | <b>0.84 (0.78 - 0.9)</b>  | <b>5.02E-06</b> | ---       | <b>2.47E-01</b>            |
| rs6461477  | 7   | 20086589  | -                | a             | g                 | <b>0.73</b>              | <b>0.68</b>             | <b>0.83 (0.77 - 0.91)</b> | <b>1.87E-05</b> | ---       | <b>1.45E-01</b>            |
| rs1595665  | 4   | 161630317 | -                | t             | c                 | <b>0.09</b>              | <b>0.08</b>             | <b>1.33 (1.17 - 1.51)</b> | <b>1.90E-05</b> | ++        | <b>8.86E-04</b>            |
| rs6443876  | 3   | 184553100 | <i>MCF2L2</i>    | t             | c                 | <b>0.89</b>              | <b>0.95</b>             | <b>1.3 (1.15 - 1.46)</b>  | <b>2.16E-05</b> | +++       | <b>3.41E-01</b>            |
| rs11683782 | 2   | 30384693  | -                | a             | c                 | <b>0.71</b>              | <b>0.64</b>             | <b>0.84 (0.77 - 0.91)</b> | <b>2.71E-05</b> | ---       | <b>1.77E-01</b>            |
| rs4340250  | 14  | 23285337  | -                | t             | c                 | <b>0.09</b>              | <b>0.09</b>             | <b>1.39 (1.19 - 1.62)</b> | <b>3.71E-05</b> | +?+       | <b>8.84E-05</b>            |
| rs912697   | 13  | 95846724  | <i>HS6ST3</i>    | a             | g                 | <b>0.57</b>              | <b>0.42</b>             | <b>1.17 (1.09 - 1.27)</b> | <b>5.17E-05</b> | +++       | <b>9.77E-02</b>            |
| rs12070355 | 1   | 182947237 | <i>EDEM3</i>     | t             | c                 | <b>0.02</b>              | <b>0.01</b>             | <b>1.82 (1.36 - 2.43)</b> | <b>5.41E-05</b> | +++       | <b>7.18E-02</b>            |
| rs817575   | 17  | 64911849  | -                | t             | c                 | <b>0.07</b>              | <b>0.01</b>             | <b>1.44 (1.2 - 1.73)</b>  | <b>7.18E-05</b> | +?-       | <b>7.43E-06</b>            |
| rs11862438 | 16  | 82879154  | <i>WFDC1</i>     | c             | g                 | <b>0.83</b>              | <b>0.9</b>              | <b>0.82 (0.74 - 0.9)</b>  | <b>8.81E-05</b> | ---       | <b>1.84E-02</b>            |
| rs1273153  | 14  | 59016212  | <i>C14orf149</i> | t             | c                 | <b>0.97</b>              | <b>0.96</b>             | <b>0.62 (0.49 - 0.79)</b> | <b>9.38E-05</b> | -+        | <b>7.34E-05</b>            |
| rs9494335  | 6   | 136053557 | <i>C6orf217</i>  | a             | g                 | <b>0.61</b>              | <b>0.67</b>             | <b>0.86 (0.79 - 0.93)</b> | <b>9.56E-05</b> | ---       | <b>3.74E-02</b>            |
| rs16910638 | 9   | 26616729  | -                | a             | g                 | 0.92                     | 0.94                    | 0.77 (0.67 - 0.88)        | 0.000111        | -+        | 6.26E-06                   |
| rs17767562 | 13  | 96073933  | <i>HS6ST3</i>    | t             | c                 | 0.62                     | 0.56                    | 1.16 (1.08 - 1.25)        | 0.000117        | +++       | 5.90E-02                   |
| rs6854968  | 4   | 94452990  | <i>GRID2</i>     | t             | c                 | 0.51                     | 0.31                    | 0.86 (0.8 - 0.93)         | 0.000132        | ---       | 4.33E-02                   |
| rs1541318  | 1   | 4534838   | -                | a             | g                 | 0.58                     | 0.59                    | 0.86 (0.8 - 0.93)         | 0.000143        | ---       | 6.89E-03                   |
| rs6904271  | 6   | 109822899 | <i>PPIL6</i>     | c             | g                 | 0.94                     | 0.99                    | 0.72 (0.6 - 0.85)         | 0.000153        | -+        | 4.34E-08                   |
| rs7149193  | 14  | 96574852  | -                | t             | c                 | 0.06                     | 0.07                    | 1.35 (1.15 - 1.58)        | 0.000165        | ++        | 1.91E-04                   |
| rs2264692  | 2   | 57585448  | -                | a             | g                 | 0.79                     | 0.89                    | 1.22 (1.1 - 1.35)         | 0.000208        | +++       | 1.26E-01                   |
| rs11680070 | 2   | 236209220 | <i>AGAP1</i>     | a             | g                 | 0.47                     | 0.3                     | 0.87 (0.8 - 0.94)         | 0.000354        | ---       | 2.19E-02                   |
| rs12595602 | 15  | 57257509  | <i>MIR2116</i>   | t             | c                 | 0.96                     | 0.99                    | 0.68 (0.55 - 0.84)        | 0.000382        | -+        | 2.28E-04                   |

SUPPLEMENTARY DATA

|            |    |           |                 |   |   |      |      |                    |          |     |          |
|------------|----|-----------|-----------------|---|---|------|------|--------------------|----------|-----|----------|
| rs6872716  | 5  | 86441204  | -               | a | g | 0.02 | 0.01 | 1.53 (1.21 - 1.94) | 0.000423 | +++ | 4.83E-03 |
| rs16900672 | 5  | 31136814  | -               | a | g | 0.12 | 0.15 | 1.22 (1.09 - 1.37) | 0.000446 | +++ | 5.15E-02 |
| rs13066950 | 3  | 37428116  | <i>C3orf35</i>  | t | g | 0.37 | 0.31 | 1.15 (1.06 - 1.24) | 0.000498 | +++ | 4.35E-02 |
| rs17650811 | 18 | 32303423  | <i>FHOD3</i>    | t | c | 0.59 | 0.5  | 0.88 (0.81 - 0.94) | 0.000543 | --- | 8.06E-02 |
| rs7848936  | 9  | 120352453 | -               | a | g | 0.16 | 0.06 | 0.84 (0.76 - 0.93) | 0.000838 | --- | 3.01E-03 |
| rs1967678  | 20 | 2312386   | <i>TGM6</i>     | t | c | 0.04 | 0.04 | 1.33 (1.12 - 1.59) | 0.00149  | +++ | 8.59E-02 |
| rs8025697  | 15 | 58070503  | -               | a | c | 0.45 | 0.47 | 0.89 (0.83 - 0.96) | 0.002585 | --+ | 7.63E-04 |
| rs12146944 | 13 | 52224438  | -               | a | g | 0.11 | 0.07 | 1.21 (1.07 - 1.36) | 0.002645 | ++  | 1.70E-05 |
| rs173483   | 5  | 73408092  | -               | a | c | 0.53 | 0.64 | 0.9 (0.83 - 0.96)  | 0.003321 | --+ | 3.16E-03 |
| rs6506395  | 18 | 6464590   | -               | a | g | 0.82 | 0.74 | 0.86 (0.78 - 0.95) | 0.003401 | --+ | 6.47E-05 |
| rs2367278  | 3  | 194244411 | -               | a | g | 0.74 | 0.77 | 0.89 (0.81 - 0.96) | 0.003899 | --+ | 8.98E-03 |
| rs10068422 | 5  | 120150593 | -               | a | c | 0.46 | 0.46 | 0.89 (0.83 - 0.96) | 0.004022 | --+ | 5.28E-04 |
| rs1257906  | 14 | 97748922  | -               | a | g | 0.18 | 0.23 | 1.14 (1.04 - 1.25) | 0.006499 | +++ | 6.34E-02 |
| rs7613969  | 3  | 23308027  | <i>UBE2E2</i>   | a | g | 0.63 | 0.6  | 1.11 (1.03 - 1.19) | 0.009247 | +++ | 5.50E-02 |
| rs878578   | 14 | 95016748  | <i>C14orf49</i> | a | c | 0.15 | 0.15 | 1.14 (1.03 - 1.27) | 0.009433 | ++  | 7.47E-03 |
| rs12267292 | 10 | 120591273 | -               | a | g | 0.07 | 0.11 | 1.2 (1.04 - 1.39)  | 0.01152  | ++  | 4.11E-03 |
| rs1078439  | 17 | 69055901  | <i>SDK2</i>     | t | c | 0.72 | 0.81 | 0.9 (0.83 - 0.98)  | 0.01315  | --- | 1.90E-02 |
| rs11035260 | 11 | 39395904  | -               | a | c | 0.95 | 0.96 | 0.81 (0.69 - 0.96) | 0.01541  | --- | 3.16E-02 |
| rs737337   | 19 | 11208493  | <i>DOCK6</i>    | t | c | 0.88 | 0.93 | 0.88 (0.79 - 0.98) | 0.0186   | --+ | 1.23E-03 |
| rs26642    | 5  | 61820146  | <i>IPO11</i>    | a | g | 0.52 | 0.49 | 1.09 (1.01 - 1.18) | 0.02124  | ++  | 2.43E-04 |
| rs11968879 | 6  | 150202935 | <i>LRP11</i>    | a | g | 0.09 | 0    | 1.16 (1.01 - 1.32) | 0.03308  | +-- | 1.47E-07 |
| rs242387   | 14 | 55661157  | <i>PELI2</i>    | a | g | 0.35 | 0.45 | 0.92 (0.86 - 1)    | 0.04235  | --+ | 1.34E-02 |
| rs12028808 | 1  | 185745432 | -               | t | g | 0.95 | 0.98 | 0.83 (0.7 - 0.99)  | 0.04286  | --+ | 7.04E-05 |
| rs9803782  | 1  | 218590144 | -               | t | g | 0.68 | 0.7  | 1.08 (1 - 1.17)    | 0.05934  | ++  | 6.77E-04 |
| rs1320322  | 15 | 79126926  | -               | a | g | 0.12 | 0.09 | 1.11 (0.99 - 1.25) | 0.06482  | ++  | 4.46E-05 |
| rs8091187  | 18 | 10086503  | -               | t | c | 0.19 | 0.3  | 0.91 (0.81 - 1.01) | 0.06703  | --+ | 1.83E-03 |
| rs334527   | 7  | 47533752  | <i>TNS3</i>     | t | c | 0.72 | 0.64 | 1.07 (0.98 - 1.16) | 0.1099   | ++  | 3.54E-04 |
| rs7743464  | 6  | 3906287   | -               | t | c | 0.47 | 0.55 | 1.06 (0.98 - 1.14) | 0.1448   | ++  | 8.91E-05 |
| rs13283425 | 9  | 89513040  | <i>DAPK1</i>    | a | g | 0.98 | 0.98 | 1.23 (0.89 - 1.71) | 0.2122   | ++  | 3.00E-05 |
| rs3890384  | 19 | 19136735  | <i>MEF2B</i>    | t | c | 0.27 | 0.16 | 1.05 (0.96 - 1.14) | 0.2942   | +-- | 1.36E-06 |
| rs3806185  | 1  | 158015510 | <i>DUSP23</i>   | t | c | 0.29 | 0.18 | 1.04 (0.96 - 1.13) | 0.3088   | ++  | 4.83E-07 |



SUPPLEMENTARY DATA

|            |    |           |                |   |   |      |      |                    |        |     |          |
|------------|----|-----------|----------------|---|---|------|------|--------------------|--------|-----|----------|
| rs12162546 | 21 | 14898510  | -              | a | t | 0.53 | 0.5  | 1.04 (0.96 - 1.12) | 0.3116 | +-- | 6.59E-06 |
| rs10991125 | 9  | 105957591 | -              | a | g | 0.62 | 0.64 | 0.97 (0.9 - 1.05)  | 0.4336 | +++ | 3.25E-04 |
| rs7617587  | 3  | 149857801 | -              | t | c | 0.04 | 0.01 | 0.92 (0.72 - 1.18) | 0.513  | +-- | 9.97E-15 |
| rs9934375  | 16 | 6656877   | <i>A2BP1</i>   | c | g | 0.88 | 0.94 | 0.97 (0.86 - 1.09) | 0.5923 | +-- | 2.22E-05 |
| rs4968967  | 17 | 64389259  | <i>ABCA8</i>   | c | g | 0.17 | 0.29 | 0.98 (0.89 - 1.08) | 0.682  | +++ | 1.14E-05 |
| rs2470983  | 7  | 122561839 | <i>SLC13A1</i> | a | c | 0.19 | 0.15 | 0.99 (0.89 - 1.09) | 0.7661 | --+ | 6.64E-06 |
| rs700952   | 2  | 5428205   | -              | t | c | 0.9  | 0.83 | 1.02 (0.89 - 1.16) | 0.7822 | +-- | 4.77E-06 |

SUPPLEMENTARY DATA

**Supplementary Table 6.** T2D results for lead SNPs unadjusted for BMI and after inclusion of 10 principal components (PCs)

| SNP       | Effect Allele |             | Age, sex, BMI, 5 PCs | Age, sex, 5 PCs   | Age, sex, BMI, 10 PCs |
|-----------|---------------|-------------|----------------------|-------------------|-----------------------|
| rs9552911 | A             | OR (95% CI) | 0.61 (0.47-0.80)     | 0.62 (0.47-0.80)  | 0.60 (0.46-0.79)      |
|           |               | <i>P</i>    | 3.08E-04             | 3.40E-04          | 2.45E-04              |
| rs1470579 | A             | OR (95% CI) | 0.76 (0.66-0.88)     | 0.77 (0.67-0.85)  | 0.75 (0.65-0.87)      |
|           |               | <i>P</i>    | 2.53E-04             | 3.35E-04          |                       |
| rs7903146 | T             | OR (95% CI) | 1.32 (1.13-1.52)     | 1.29 (1.12- 1.50) | 1.33 (1.15-1.54)      |
|           |               | <i>P</i>    | 3.23E-04             | 6.31E-04          | 1.16E-04              |

Principal components were constructed only from the Sikh population

SUPPLEMENTARY DATA

**Supplementary Table 7.** Stage 1, 2a, 2b and 3a meta-analysis results in Punjabis (including non Sikh Punjabis from PROMIS) with  $P < 0.01$

| CHR       | SNP               | BP               | Gene                   | Effect/other allele | Effect Allele Frequency | OR(95%CI)                 | P               | Direction       | $P_{\text{heterogeneity}}$ |
|-----------|-------------------|------------------|------------------------|---------------------|-------------------------|---------------------------|-----------------|-----------------|----------------------------|
| 10        | rs7903146         | 114748339        | <i>TCF7L2</i>          | t/c                 | 0.31                    | 1.3 (1.23 - 1.37)         | 5.50E-22        | +++++++         | 2.34E-03                   |
| <b>5</b>  | <b>rs17053082</b> | <b>155326808</b> | <b>N/A</b>             | <b>t/c</b>          | <b>0.10</b>             | <b>1.49 (1.28 - 1.73)</b> | <b>4.17E-07</b> | <b>+?+?????</b> | <b>6.36E-01</b>            |
| 3         | rs1470579         | 187011774        | <i>IGF2BP2</i>         | a/c                 | 0.59                    | 0.88 (0.83 - 0.92)        | 4.21E-07        | -----           | 4.63E-01                   |
| <b>18</b> | <b>rs1893835</b>  | <b>43971662</b>  | <b>ZBTB7C</b>          | <b>a/g</b>          | <b>0.54</b>             | <b>0.89 (0.84 - 0.94)</b> | <b>2.10E-05</b> | <b>-+?-----</b> | <b>4.31E-02</b>            |
| <b>13</b> | <b>rs17767562</b> | <b>96073933</b>  | <b>HS6ST3</b>          | <b>t/c</b>          | <b>0.64</b>             | <b>1.12 (1.06 - 1.18)</b> | <b>3.17E-05</b> | <b>+++++++</b>  | <b>2.73E-01</b>            |
| <b>20</b> | <b>rs328506</b>   | <b>55463010</b>  | <b>HMG1L1</b>          | <b>t/c</b>          | <b>0.21</b>             | <b>0.87 (0.81 - 0.93)</b> | <b>3.22E-05</b> | <b>-+?-----</b> | <b>6.54E-02</b>            |
| 2         | rs12471062        | 221613429        | .                      | t/c                 | 0.14                    | 0.83 (0.76 - 0.91)        | 0.0001024       | -??-?-?         | 1.02E-01                   |
| 1         | rs767015          | 95169520         | N/A                    | t/c                 | 0.35                    | 1.12 (1.06 - 1.19)        | 0.0001271       | ++?+++?+        | 8.60E-02                   |
| 8         | rs13261832        | 1123422          | .                      | a/g                 | 0.48                    | 1.12 (1.05 - 1.18)        | 0.0001421       | ++?++++         | 1.07E-01                   |
| 7         | rs10081175        | 146291857        | N/A                    | a/g                 | 0.12                    | 0.85 (0.78 - 0.93)        | 0.0001691       | --?-----        | 2.44E-01                   |
| 7         | rs4281065         | 120189033        | N/A                    | a/t                 | 0.91                    | 1.21 (1.09 - 1.33)        | 0.0001941       | ++?+++?+        | 4.34E-02                   |
| 18        | rs12455915        | 51995450         | <i>ENSG00000206129</i> | t/c                 | 0.81                    | 0.88 (0.82 - 0.94)        | 0.0002031       | --?--+-         | 9.75E-02                   |
| 2         | rs6733255         | 127378856        | N/A                    | t/c                 | 0.88                    | 1.17 (1.08 - 1.28)        | 0.0002954       | ++?+++          | 2.80E-01                   |
| 15        | rs12594126        | 95916500         | .                      | a/g                 | 0.40                    | 0.9 (0.85 - 0.95)         | 0.0003178       | --?---+         | 8.69E-02                   |
| 3         | rs1688334         | 55152926         | N/A                    | t/c                 | 0.58                    | 0.9 (0.85 - 0.95)         | 0.0003219       | --?---+         | 2.64E-01                   |
| 11        | rs2005833         | 2819863          | <i>KCNQ1</i>           | a/g                 | 0.55                    | 0.9 (0.85 - 0.95)         | 0.0003243       | --?---++        | 6.88E-02                   |
| 10        | rs867221          | 10895303         | <i>CUGBP2</i>          | t/g                 | 0.39                    | 1.11 (1.05 - 1.17)        | 0.0003542       | ++?+++          | 3.72E-02                   |
| 5         | rs9293474         | 86003890         | <i>COX7C</i>           | a/g                 | 0.92                    | 1.2 (1.09 - 1.33)         | 0.0004149       | ++?++++         | 1.67E-01                   |
| 7         | rs4719818         | 25670890         | .                      | t/g                 | 0.40                    | 0.9 (0.85 - 0.96)         | 0.0004819       | --?---+         | 1.29E-01                   |
| 1         | rs9726220         | 219748197        | <i>DUSP10</i>          | a/c                 | 0.63                    | 1.11 (1.05 - 1.17)        | 0.0004987       | ++?++++         | 3.56E-01                   |
| 17        | rs623323          | 646770           | <i>NXN</i>             | t/c                 | 0.14                    | 1.13 (1.06 - 1.22)        | 0.0005597       | ++++-+-         | 5.19E-02                   |
| 4         | rs6854968         | 94452990         | <i>GRID2</i>           | t/c                 | 0.50                    | 0.92 (0.87 - 0.96)        | 0.0005727       | -----+-         | 2.68E-02                   |
| 14        | rs4340250         | 23285337         | N/A                    | t/c                 | 0.09                    | 1.31 (1.12 - 1.54)        | 0.0006024       | +?+?????        | 1.27E-03                   |
| 16        | rs17831104        | 24538439         | <i>RBBP6</i>           | t/c                 | 0.91                    | 0.85 (0.77 - 0.93)        | 0.0007228       | --?-----        | 2.94E-01                   |
| 8         | rs7823751         | 29383843         | N/A                    | a/g                 | 0.94                    | 0.81 (0.72 - 0.92)        | 0.0007258       | --?---+-        | 1.01E-01                   |
| 13        | rs9556576         | 95811689         | <i>HS6ST3</i>          | a/g                 | 0.58                    | 0.85 (0.77 - 0.93)        | 0.0007335       | -?-?????        | 7.03E-02                   |
| 7         | rs6978494         | 120194821        | <i>KCND2</i>           | t/c                 | 0.89                    | 1.17 (1.07 - 1.28)        | 0.0008088       | ++?++++-        | 1.34E-01                   |

SUPPLEMENTARY DATA

|    |            |           |                        |     |      |                    |           |           |          |
|----|------------|-----------|------------------------|-----|------|--------------------|-----------|-----------|----------|
| 13 | rs912697   | 95846724  | <i>HS6ST3</i>          | a/g | 0.57 | 1.09 (1.04 - 1.15) | 0.0008979 | +++++?+   | 3.33E-02 |
| 8  | rs4527850  | 134266031 | <i>WISP1</i>           | t/c | 0.73 | 1.1 (1.04 - 1.17)  | 0.0009449 | +++++--   | 1.07E-02 |
| 2  | rs1032838  | 49253850  | N/A                    | a/g | 0.34 | 0.91 (0.86 - 0.96) | 0.0009948 | --?-----  | 1.87E-01 |
| 2  | rs11677281 | 70683359  | <i>TGFA</i>            | t/c | 0.78 | 1.12 (1.05 - 1.2)  | 0.001087  | +--?+++++ | 1.31E-01 |
| 2  | rs11680070 | 236209220 | <i>CENTG2</i>          | a/g | 0.48 | 0.92 (0.87 - 0.97) | 0.001159  | -----+?+  | 1.07E-02 |
| 1  | rs1983967  | 101379491 | N/A                    | t/c | 0.95 | 0.81 (0.71 - 0.92) | 0.00122   | -+?-----  | 1.98E-02 |
| 22 | rs4345013  | 25711837  | N/A                    | t/c | 0.68 | 0.91 (0.86 - 0.96) | 0.00127   | --?---++  | 7.46E-03 |
| 6  | rs9494335  | 136053557 | <i>C6orf217</i>        | a/g | 0.60 | 0.92 (0.87 - 0.97) | 0.001328  | ---+--+?  | 9.29E-03 |
| 2  | rs2264692  | 57585448  | -                      | a/g | 0.83 | 1.13 (1.05 - 1.22) | 0.001401  | ++++--?-  | 3.73E-02 |
| 3  | rs2531747  | 45803590  | N/A                    | t/c | 0.39 | 0.91 (0.86 - 0.97) | 0.001553  | --?+----- | 2.71E-02 |
| 2  | rs1435172  | 221609128 | .                      | t/g | 0.84 | 1.13 (1.05 - 1.22) | 0.001585  | +--?+++++ | 1.58E-02 |
| 22 | rs140572   | 43830391  | N/A                    | a/c | 0.23 | 0.9 (0.84 - 0.96)  | 0.001605  | --?---++  | 1.66E-01 |
| 3  | rs12490338 | 126682734 | <i>SNX4</i>            | c/g | 0.94 | 0.82 (0.73 - 0.93) | 0.001858  | --?---?-  | 4.34E-02 |
| 14 | rs7154126  | 46696235  | <i>MDGA2</i>           | t/c | 0.86 | 1.14 (1.05 - 1.23) | 0.002021  | ++?+---   | 1.24E-01 |
| 7  | rs10235225 | 25872124  | .                      | a/g | 0.72 | 1.11 (1.04 - 1.18) | 0.002104  | ++?+++?+  | 4.54E-02 |
| 9  | rs16910638 | 26616729  | .                      | a/g | 0.93 | 0.86 (0.78 - 0.95) | 0.002145  | --+---?-  | 3.06E-03 |
| 13 | rs9552911  | 22762657  | <i>SGCG</i>            | a/g | 0.08 | 0.86 (0.79 - 0.95) | 0.002167  | ---+----  | 3.40E-04 |
| 13 | rs7337905  | 112376526 | <i>ENSG00000197595</i> | a/g | 0.69 | 0.91 (0.86 - 0.97) | 0.002265  | --?+---+  | 4.71E-02 |
| 12 | rs10437877 | 92682154  | <i>CRADD</i>           | a/g | 0.58 | 1.09 (1.03 - 1.16) | 0.002368  | ++?+++?+  | 4.63E-03 |
| 2  | rs12693236 | 180876095 | N/A                    | t/c | 0.47 | 1.16 (1.05 - 1.28) | 0.002431  | +?+?????  | 5.56E-02 |
| 8  | rs16937619 | 72455638  | N/A                    | a/c | 0.81 | 1.11 (1.04 - 1.2)  | 0.002593  | ++?+++++  | 3.33E-02 |
| 14 | rs4523859  | 80328831  | <i>C14orf145</i>       | a/g | 0.34 | 1.1 (1.03 - 1.16)  | 0.003053  | ++?+++?+  | 1.07E-02 |
| 22 | rs877161   | 48143787  | N/A                    | a/g | 0.65 | 1.09 (1.03 - 1.16) | 0.00323   | ++?+++++  | 2.78E-01 |
| 6  | rs9401003  | 117824996 | <i>ROS1</i>            | a/g | 0.77 | 0.91 (0.85 - 0.97) | 0.003409  | --?---++  | 1.10E-01 |
| 3  | rs6804610  | 2844944   | <i>CNTN4</i>           | t/g | 0.28 | 1.1 (1.03 - 1.17)  | 0.003827  | ++?+----  | 1.55E-01 |
| 6  | rs1475345  | 11338388  | <i>NEDD9</i>           | a/g | 0.66 | 1.09 (1.03 - 1.16) | 0.004185  | ++?+---+  | 1.74E-03 |
| 11 | rs12271603 | 104617228 | N/A                    | a/g | 0.35 | 0.92 (0.87 - 0.97) | 0.004211  | --?+---+  | 1.15E-03 |
| 14 | rs7149193  | 96574852  | <i>VRK1</i>            | t/c | 0.06 | 1.18 (1.05 - 1.31) | 0.004276  | +-----?+  | 1.16E-01 |
| 11 | rs10501118 | 29851786  | N/A                    | a/g | 0.80 | 1.11 (1.03 - 1.18) | 0.00438   | ++?+++++  | 8.28E-02 |
| 3  | rs4855496  | 68735025  | <i>FAM19A1</i>         | a/g | 0.19 | 0.89 (0.82 - 0.97) | 0.004715  | -??-+?-   | 1.56E-03 |
| 14 | rs1950670  | 58593561  | <i>DAAM1</i>           | a/g | 0.31 | 0.92 (0.86 - 0.97) | 0.004925  | --?-----  | 3.10E-01 |

SUPPLEMENTARY DATA

|    |            |           |                |     |      |                    |          |           |          |
|----|------------|-----------|----------------|-----|------|--------------------|----------|-----------|----------|
| 5  | rs1707082  | 22829091  | <i>CDH12</i>   | t/g | 0.91 | 0.87 (0.79 - 0.96) | 0.005269 | -+?-----  | 1.90E-01 |
| 11 | rs680465   | 118006173 | <i>PHLDB1</i>  | a/g | 0.13 | 1.12 (1.04 - 1.22) | 0.005513 | + -?++++- | 4.17E-02 |
| 8  | rs4840341  | 8279075   | <i>PRAGMIN</i> | a/g | 0.49 | 1.09 (1.02 - 1.15) | 0.005516 | +++?+++?+ | 7.66E-02 |
| 22 | rs1860945  | 15774989  | N/A            | t/c | 0.76 | 1.1 (1.03 - 1.17)  | 0.005612 | +++?+---  | 5.73E-02 |
| 13 | rs9549880  | 111910189 | <i>SOX1</i>    | a/g | 0.35 | 1.09 (1.02 - 1.15) | 0.005658 | + -?+---+ | 1.38E-02 |
| 7  | rs12700664 | 25841676  | .              | t/c | 0.41 | 0.92 (0.87 - 0.98) | 0.006104 | --?+----  | 1.60E-01 |
| 16 | rs10492807 | 31687619  | <i>ZNF267</i>  | c/g | 0.94 | 0.83 (0.72 - 0.95) | 0.006182 | -??-++?+  | 6.18E-03 |
| 11 | rs7121134  | 15119762  | <i>INSC</i>    | t/g | 0.06 | 1.21 (1.06 - 1.39) | 0.006313 | +++?+++?+ | 9.90E-03 |
| 4  | rs10024068 | 186300335 | <i>SLC25A4</i> | a/g | 0.70 | 0.92 (0.87 - 0.98) | 0.006398 | --?---+-  | 9.81E-03 |
| 8  | rs2843835  | 37197978  | .              | t/c | 0.17 | 1.11 (1.03 - 1.19) | 0.006691 | + -?++++- | 8.36E-03 |
| 9  | rs1215177  | 15197485  | <i>TTC39B</i>  | t/c | 0.19 | 1.1 (1.03 - 1.18)  | 0.00714  | +++?++++  | 1.07E-01 |
| 2  | rs17356557 | 5429867   | N/A            | t/c | 0.95 | 1.35 (1.08 - 1.68) | 0.007265 | +?-?????  | 1.38E-06 |
| 7  | rs4632970  | 140919185 | N/A            | a/g | 0.33 | 1.08 (1.02 - 1.15) | 0.007312 | +++?++++- | 2.10E-01 |
| 11 | rs217727   | 1973484   | <i>H19</i>     | a/g | 0.19 | 1.1 (1.03 - 1.18)  | 0.007335 | +++?+---  | 1.03E-01 |
| 4  | rs2435530  | 38692470  | N/A            | t/c | 0.18 | 0.91 (0.84 - 0.97) | 0.007449 | --?---++  | 2.02E-01 |
| 20 | rs764673   | 41987407  | <i>TOX2</i>    | t/c | 0.37 | 0.92 (0.87 - 0.98) | 0.007557 | --?---++  | 1.61E-01 |
| 13 | rs2181502  | 98781320  | <i>UBAC2</i>   | a/g | 0.47 | 0.93 (0.88 - 0.98) | 0.007752 | --?+---+  | 2.12E-02 |
| 15 | rs1672460  | 39975327  | N/A            | a/g | 0.17 | 0.9 (0.84 - 0.97)  | 0.00839  | --?-+++-  | 9.66E-02 |
| 3  | rs6793237  | 2844449   | <i>CNTN4</i>   | a/g | 0.70 | 1.08 (1.02 - 1.15) | 0.008465 | + -?++++  | 3.14E-03 |
| 8  | rs2741200  | 134141015 | <i>TG,SLA</i>  | t/c | 0.71 | 0.92 (0.87 - 0.98) | 0.008687 | -+?--+-   | 3.75E-02 |
| 18 | rs1708693  | 32264996  | <i>FHOD3</i>   | a/c | 0.22 | 1.1 (1.03 - 1.19)  | 0.008843 | +++?++++  | 1.14E-01 |
| 13 | rs912130   | 98830403  | <i>UBAC2</i>   | t/g | 0.47 | 0.93 (0.88 - 0.98) | 0.008959 | --?+---+  | 1.60E-03 |
| 11 | rs626466   | 119342322 | N/A            | t/c | 0.27 | 0.92 (0.86 - 0.98) | 0.009407 | --?+---+  | 1.00E-01 |
| 3  | rs4688128  | 62369308  | <i>CADPS</i>   | t/c | 0.59 | 1.08 (1.02 - 1.14) | 0.009989 | +++?+---+ | 6.80E-02 |

SUPPLEMENTARY DATA

**Supplementary Table 8.** Meta-analysis results in South Asians with P<0.01

| CHR       | SNP               | BP               | Gene          | Effect/other allele | Effect Allele Frequency | OR(95%CI)                 | P               | Direction                    | P <sub>heterogeneity</sub> |
|-----------|-------------------|------------------|---------------|---------------------|-------------------------|---------------------------|-----------------|------------------------------|----------------------------|
| 10        | rs7903146         | 114748339        | TCF7L2        | t/c                 | 0.30                    | 1.15 (1.13 - 1.18)        | 2.71E-35        | +++++?+++++?+++++?           | 1.22E-12                   |
| 3         | rs1470579         | 187011774        | IGF2BP2       | a/c                 | 0.55                    | 0.94 (0.92 - 0.96)        | 4.19E-09        | -----?--?                    | 2.97E-02                   |
| <b>20</b> | <b>rs328506</b>   | <b>55463010</b>  | <b>HMG1L1</b> | <b>t/c</b>          | <b>0.20</b>             | <b>0.9 (0.87 - 0.94)</b>  | <b>1.55E-06</b> | <b>-+--?-----+--?+?+?+?</b>  | <b>1.74E-01</b>            |
| <b>7</b>  | <b>rs1593304</b>  | <b>131270387</b> | <b>PLXNA4</b> | <b>a/g</b>          | <b>0.29</b>             | <b>1.08 (1.04 - 1.12)</b> | <b>6.67E-05</b> | <b>+--+?+--++++++?+?+?+?</b> | <b>1.34E-01</b>            |
| <b>3</b>  | <b>rs4858889</b>  | <b>47455361</b>  | <b>SCAP</b>   | <b>a/g</b>          | <b>0.95</b>             | <b>0.84 (0.77 - 0.91)</b> | <b>7.41E-05</b> | <b>-??-?+--+?+---?+?+?+?</b> | <b>4.16E-02</b>            |
| <b>5</b>  | <b>rs13155082</b> | <b>46190994</b>  | .             | <b>a/g</b>          | <b>0.50</b>             | <b>0.93 (0.9 - 0.96)</b>  | <b>7.74E-05</b> | <b>-??-?+--+?+---?+?+?+?</b> | <b>1.27E-01</b>            |
| 11        | rs2005833         | 2819863          | KCNQ1         | a/g                 | 0.51                    | 0.96 (0.94 - 0.98)        | 1.22E-04        | ----?---+-----+---?+?        | 1.53E-02                   |
| 7         | rs4719818         | 25670890         | .             | t/g                 | 0.40                    | 0.94 (0.91 - 0.97)        | 2.19E-04        | ----?-----+--+?+?+?+?        | 1.58E-01                   |
| 7         | rs10235225        | 25872124         | .             | a/g                 | 0.72                    | 1.07 (1.03 - 1.12)        | 3.20E-04        | ++-+?+?+?+?+?+?+?+?+?        | 8.17E-02                   |
| 13        | rs9549880         | 111910189        | SOX1          | a/g                 | 0.35                    | 1.06 (1.03 - 1.1)         | 3.25E-04        | +++?+-----+---?+?+?+?        | 5.91E-03                   |
| 13        | rs912130          | 98830403         | UBAC2         | t/g                 | 0.47                    | 0.94 (0.91 - 0.97)        | 4.11E-04        | --+?+--+?+---?+?+?+?         | 6.52E-03                   |
| 14        | rs7149193         | 96574852         | VRK1          | t/c                 | 0.06                    | 1.13 (1.06 - 1.21)        | 4.29E-04        | +-----+?+?+?+?+?+?+?         | 3.50E-01                   |
| 7         | rs4722537         | 25893353         | .             | t/g                 | 0.23                    | 0.93 (0.9 - 0.97)         | 4.48E-04        | ----?+---+-----+?+?+?+?      | 4.48E-02                   |
| 13        | rs2181502         | 98781320         | UBAC2         | a/g                 | 0.47                    | 0.94 (0.91 - 0.98)        | 6.78E-04        | --+?+-----+---?+?+?+?        | 5.62E-02                   |
| 7         | rs12700664        | 25841676         | .             | t/c                 | 0.41                    | 0.94 (0.91 - 0.98)        | 6.88E-04        | --+?+-----+?+?+?+?           | 3.98E-01                   |
| 18        | rs1893835         | 43971662         | ZBTB7C        | a/g                 | 0.54                    | 0.95 (0.92 - 0.98)        | 1.07E-03        | --+?+-----+?+?+?+?           | 1.64E-02                   |
| 17        | rs1078439         | 69055901         | SDK2          | t/c                 | 0.71                    | 0.96 (0.94 - 0.99)        | 1.19E-03        | -----+-----+--+?             | 2.43E-01                   |
| 8         | rs4840341         | 8279075          | PRAGMIN       | a/g                 | 0.50                    | 1.06 (1.02 - 1.1)         | 1.46E-03        | ++++?+?+?+?+?+?+?+?+?        | 3.44E-01                   |
| 14        | rs12880791        | 23268791         | DHRS2         | t/c                 | 0.47                    | 0.95 (0.92 - 0.98)        | 1.71E-03        | ----?+--+?+---?+?+?+?        | 1.15E-02                   |
| 8         | rs16895122        | 122411127        | .             | t/c                 | 0.95                    | 0.89 (0.83 - 0.96)        | 1.93E-03        | +--+?+-----+?+?+?+?          | 6.23E-02                   |
| 7         | rs13234192        | 7762204          | RPA3          | a/g                 | 0.42                    | 0.95 (0.92 - 0.98)        | 2.20E-03        | ----?+-----+--+?+?+?+?       | 2.72E-01                   |
| 2         | rs12693236        | 180876095        | N/A           | t/c                 | 0.47                    | 1.16 (1.05 - 1.28)        | 2.43E-03        | +?+?+?+?+?+?+?+?+?+?         | 5.56E-02                   |
| 16        | rs17831104        | 24538439         | RBBP6         | t/c                 | 0.91                    | 0.91 (0.86 - 0.97)        | 2.44E-03        | --+?+-----+---?+?+?+?        | 2.25E-01                   |
| 7         | rs10081175        | 146291857        | N/A           | a/g                 | 0.12                    | 0.93 (0.88 - 0.97)        | 2.50E-03        | --+?+-----+---?+?+?+?        | 2.89E-01                   |
| 3         | rs11129155        | 2494956          | CNTN4         | t/c                 | 0.27                    | 0.94 (0.91 - 0.98)        | 2.57E-03        | -+-?+-----+--+?+?+?+?        | 5.67E-02                   |
| 2         | rs1032838         | 49253850         | N/A           | a/g                 | 0.34                    | 0.95 (0.92 - 0.98)        | 2.71E-03        | --+?+-----+?+?+?+?           | 1.22E-01                   |
| 3         | rs4855496         | 68735025         | FAM19A1       | a/g                 | 0.19                    | 0.93 (0.89 - 0.98)        | 4.54E-03        | -??-?+--+?+---?+?+?+?        | 6.77E-03                   |

SUPPLEMENTARY DATA

|    |            |           |                 |     |      |                    |          |                               |          |
|----|------------|-----------|-----------------|-----|------|--------------------|----------|-------------------------------|----------|
| 5  | rs11956899 | 20938564  | .               | t/c | 0.13 | 0.92 (0.86 - 0.97) | 4.55E-03 | -+--?+-?+---?+?????           | 1.70E-02 |
| 5  | rs10068422 | 120150593 | <i>PRR16</i>    | a/c | 0.46 | 0.95 (0.92 - 0.99) | 4.55E-03 | ---+--+?+---?+?????           | 1.25E-02 |
| 4  | rs6854968  | 94452990  | <i>GRID2</i>    | t/c | 0.50 | 0.96 (0.93 - 0.99) | 4.59E-03 | ---+---+---+---+---+?????     | 3.41E-03 |
| 2  | rs12471062 | 221613429 | .               | t/c | 0.14 | 0.93 (0.88 - 0.98) | 4.62E-03 | -??-?---?---+?+?????          | 1.87E-03 |
| 14 | rs2144057  | 87837408  | <i>KCNK10</i>   | a/g | 0.46 | 1.05 (1.01 - 1.08) | 4.98E-03 | +--?+---+---+---+---+?????    | 1.81E-02 |
| 18 | rs7504544  | 69085647  | .               | t/c | 0.91 | 0.92 (0.87 - 0.98) | 5.22E-03 | -+--?-----+---+?????          | 6.42E-02 |
| 22 | rs140572   | 43830391  | <i>N/A</i>      | a/c | 0.23 | 0.94 (0.91 - 0.98) | 5.51E-03 | ---+?---+---+---+---+?????    | 2.96E-01 |
| 3  | rs12632150 | 151432992 | <i>N/A</i>      | t/g | 0.85 | 0.94 (0.89 - 0.98) | 5.61E-03 | -+--?---+---+---+---+?????    | 1.11E-01 |
| 3  | rs2531747  | 45803590  | <i>N/A</i>      | t/c | 0.38 | 0.95 (0.92 - 0.99) | 5.90E-03 | ---+?+-----+---+?????         | 5.15E-03 |
| 7  | rs6965643  | 129194800 | <i>NRF1</i>     | a/g | 0.61 | 0.95 (0.92 - 0.99) | 5.91E-03 | -+--?---+---+---+---+?????    | 1.92E-02 |
| 7  | rs17158049 | 110288215 | <i>IMMP2L</i>   | t/c | 0.87 | 1.07 (1.02 - 1.12) | 6.41E-03 | +---+?+---+---+---+---+?????  | 1.19E-01 |
| 2  | rs17356557 | 5429867   | <i>N/A</i>      | t/c | 0.95 | 1.35 (1.08 - 1.68) | 7.27E-03 | +???-?????????????????        | 1.38E-06 |
| 11 | rs680465   | 118006173 | <i>PHLDB1</i>   | a/g | 0.13 | 1.07 (1.02 - 1.12) | 7.27E-03 | +---+?+++---+---+---+?????    | 9.01E-02 |
| 5  | rs9654488  | 147221889 | <i>N/A</i>      | a/g | 0.59 | 0.96 (0.92 - 0.99) | 7.55E-03 | ---+?+---+---+---+---+?????   | 9.71E-02 |
| 21 | rs2833800  | 32704523  | <i>C21orf63</i> | t/c | 0.45 | 1.05 (1.01 - 1.08) | 7.62E-03 | +++?+---+---+---+---+?????    | 1.11E-01 |
| 2  | rs7592134  | 132889535 | <i>GPR39</i>    | a/g | 0.62 | 1.05 (1.01 - 1.09) | 7.85E-03 | +---+?+---+---+---+---+?????  | 3.37E-03 |
| 6  | rs9494335  | 136053557 | <i>C6orf217</i> | a/g | 0.59 | 0.97 (0.95 - 0.99) | 7.96E-03 | ---+---+?---+?+??-?           | 1.13E-02 |
| 20 | rs6097573  | 51827864  | <i>N/A</i>      | a/c | 0.27 | 1.05 (1.01 - 1.09) | 8.00E-03 | +---+?+++++---+---+---+?????  | 9.14E-02 |
| 15 | rs7166244  | 58073942  | <i>N/A</i>      | a/g | 0.28 | 1.05 (1.01 - 1.09) | 8.26E-03 | +++?+---+---+---+---+?????    | 1.27E-01 |
| 3  | rs12490338 | 126682734 | <i>SNX4</i>     | c/g | 0.94 | 0.91 (0.84 - 0.98) | 9.28E-03 | ----?---?---+?+?????          | 1.46E-01 |
| 2  | rs3769845  | 230863948 | <i>SP140</i>    | t/c | 0.27 | 1.05 (1.01 - 1.09) | 9.78E-03 | +---+?+---+---+---+---+?????  | 1.76E-03 |
| 13 | rs9552911  | 22762657  | <i>SGCG</i>     | a/g | 0.13 | 1.01 (0.98 - 1.05) | 4.66E-01 | ---+---+---+---+---+---+????? | 2.07E-04 |

SUPPLEMENTARY DATA

Supplementary Table 9. Meta-analysis results in all Asians (including South and East Asians)

| CHR | SNP        | BP        | Gene      | Effect/other allele | OR(95%CI)          | P        | Direction | P <sub>heterogeneity</sub> |
|-----|------------|-----------|-----------|---------------------|--------------------|----------|-----------|----------------------------|
| 10  | rs7903146  | 114748339 | TCF7L2    | t/c                 | 1.15 (1.12 - 1.17) | 1.93E-38 | +++++     | 4.45E-14                   |
| 3   | rs1470579  | 187011774 | IGF2BP2   | a/c                 | 0.94 (0.93 - 0.96) | 1.54E-13 | -----     | 7.45E-08                   |
| 11  | rs2005833  | 2819863   | KCNQ1     | a/g                 | 0.97 (0.95 - 0.99) | 0.00041  | ----?     | 1.53E-02                   |
| 3   | rs7613969  | 23308027  | UBE2E2    | a/g                 | 1.03 (1.01 - 1.04) | 0.0010   | +++++     | 4.68E-02                   |
| 11  | rs11035260 | 39395904  | -         | a/c                 | 0.94 (0.91 - 0.98) | 0.0053   | -----     | 1.66E-02                   |
| 2   | rs2264692  | 57585448  | -         | a/g                 | 1.04 (1.01 - 1.07) | 0.011    | +++++     | 1.00E-02                   |
| 3   | rs7617587  | 149857801 | -         | t/c                 | 0.96 (0.92 - 0.99) | 0.025    | +-----    | 7.85E-10                   |
| 17  | rs1078439  | 69055901  | SDK2      | t/c                 | 0.98 (0.96 - 1.00) | 0.026    | -----     | 1.68E-01                   |
| 14  | rs1273153  | 59016212  | C14orf149 | t/c                 | 0.94 (0.89 - 0.99) | 0.027    | -++++     | 3.47E-03                   |
| 1   | rs12070355 | 182947237 | EDEM3     | t/c                 | 1.12 (1.01 - 1.24) | 0.037    | +++---    | 1.01E-02                   |
| 13  | rs912697   | 95846724  | HS6ST3    | a/g                 | 1.01 (1.00 - 1.03) | 0.094    | ++---     | 1.93E-02                   |
| 17  | rs623323   | 646770    | NXN       | t/c                 | 1.02 (0.99 - 1.04) | 0.14     | +++++     | 9.09E-04                   |
| 3   | rs13066950 | 37428116  | C3orf35   | t/g                 | 1.01 (0.99 - 1.03) | 0.19     | +++++     | 7.74E-02                   |
| 1   | rs6426514  | 226946738 | RHOA      | a/g                 | 1.03 (0.98 - 1.08) | 0.23     | +-----    | 7.82E-05                   |
| 2   | rs11683782 | 30384693  | -         | a/c                 | 0.99 (0.97 - 1.01) | 0.29     | ---+      | 1.83E-03                   |
| 6   | rs11968879 | 150202935 | LRP11     | a/g                 | 1.02 (0.98 - 1.05) | 0.29     | +---+     | 1.54E-05                   |
| 20  | rs1967678  | 2312386   | TGM6      | t/c                 | 1.03 (0.98 - 1.08) | 0.31     | +++++     | 1.78E-02                   |
| 6   | rs9494335  | 136053557 | C6orf217  | a/g                 | 0.99 (0.98 - 1.01) | 0.32     | ---+      | 3.46E-03                   |
| 14  | rs1257906  | 97748922  | -         | a/g                 | 1.01 (0.99 - 1.03) | 0.39     | +++++     | 2.30E-01                   |
| 4   | rs1595665  | 161630317 | -         | t/c                 | 1.01 (0.98 - 1.05) | 0.41     | +---+     | 2.11E-02                   |
| 5   | rs17053082 | 155326808 | N/A       | t/c                 | 1.02 (0.98 - 1.06) | 0.43     | +++++     | 6.79E-06                   |
| 2   | rs700952   | 5428205   | -         | t/c                 | 0.99 (0.96 - 1.02) | 0.48     | +-----    | 8.57E-06                   |
| 13  | rs9552911  | 22762657  | SGCG      | a/g                 | 1.01 (0.99 - 1.03) | 0.49     | ---+      | 1.05E-03                   |
| 16  | rs11862438 | 82879154  | WFDC1     | c/g                 | 1.01 (0.98 - 1.03) | 0.53     | -----     | 2.86E-02                   |
| 14  | rs242387   | 55661157  | PELI2     | a/g                 | 1.00 (0.99 - 1.02) | 0.66     | ---+      | 3.52E-03                   |
| 3   | rs6443876  | 184553100 | MCF2L2    | t/c                 | 1.00 (0.98 - 1.03) | 0.68     | ++---     | 2.26E-02                   |
| 7   | rs6461477  | 20086589  | -         | a/g                 | 1.00 (0.97 - 1.02) | 0.68     | ---+      | 6.78E-04                   |
| 6   | rs6904271  | 109822899 | PPIL6     | c/g                 | 1.01 (0.97 - 1.04) | 0.77     | -++---    | 1.98E-05                   |
| 15  | rs12595602 | 57257509  | MIR2116   | t/c                 | 1.00 (0.95 - 1.04) | 0.86     | +++++     | 2.11E-03                   |
| 8   | rs4527850  | 134266031 | WISP1     | t/c                 | 1.00 (0.98 - 1.02) | 0.93     | +++++     | 1.21E-02                   |



SUPPLEMENTARY DATA

**Supplementary Table 10.** Multi-ethnic Meta-analysis results

| CHR | SNP        | BP        | Gene             | Effect/other allele | OR(95%CI)          | P        | Direction                     | P <sub>heterogeneity</sub> |
|-----|------------|-----------|------------------|---------------------|--------------------|----------|-------------------------------|----------------------------|
| 10  | rs7903146  | 114748339 | <i>TCF7L2</i>    | t/c                 | 1.19 (1.17 - 1.21) | 8.53E-75 | +++++?+++++                   | 8.08E-26                   |
| 3   | rs1470579  | 187011774 | <i>IGF2BP2</i>   | a/c                 | 0.93 (0.92 - 0.95) | 1.81E-19 | -----??-?-----+               | 5.34E-09                   |
| 3   | rs7613969  | 23308027  | <i>UBE2E2</i>    | a/g                 | 1.03 (1.01 - 1.04) | 1.69E-04 | +++++-----+?-----+            | 5.66E-02                   |
| 11  | rs2005833  | 2819863   | <i>KCNQ1</i>     | a/g                 | 0.97 (0.96 - 0.99) | 5.13E-04 | ---?---+---?---+---+?-        | 1.88E-02                   |
| 11  | rs11035260 | 39395904  | -                | a/c                 | 0.95 (0.91 - 0.98) | 4.25E-03 | -----+---+?+?+---+?-          | 2.23E-02                   |
| 3   | rs7617587  | 149857801 | -                | t/c                 | 0.96 (0.92 - 0.99) | 0.025    | +-----+?--?--?+-----?         | 7.85E-10                   |
| 2   | rs2264692  | 57585448  | -                | a/g                 | 1.03 (1.00 - 1.06) | 0.028    | +++++---?---?+---+?+---+      | 8.58E-03                   |
| 14  | rs1273153  | 59016212  | <i>C14orf149</i> | t/c                 | 0.95 (0.91 - 0.99) | 0.029    | -+---+---+?+0?---?+---+---    | 4.55E-03                   |
| 1   | rs12070355 | 182947237 | <i>EDEM3</i>     | t/c                 | 1.12 (1.01 - 1.24) | 0.037    | +++---?---?+---+?+---+        | 1.01E-02                   |
| 1   | rs6426514  | 226946738 | <i>RHOU</i>      | a/g                 | 1.04 (1.00 - 1.08) | 0.037    | +---+---+?---?+---+?+---+     | 9.75E-05                   |
| 13  | rs912697   | 95846724  | <i>HS6ST3</i>    | a/g                 | 1.02 (1.00 - 1.03) | 0.044    | +---+---+?+---+?+---+         | 2.59E-02                   |
| 17  | rs1078439  | 69055901  | <i>SDK2</i>      | t/c                 | 0.98 (0.97 - 1.00) | 0.044    | -----+---+---?---+---+?+      | 1.70E-01                   |
| 17  | rs623323   | 646770    | <i>NXN</i>       | t/c                 | 1.02 (1.00 - 1.04) | 0.084    | +++++---+---+?---+---+---+    | 1.37E-03                   |
| 2   | rs700952   | 5428205   | -                | t/c                 | 0.98 (0.96 - 1.01) | 0.21     | +-----?-----+?+---+?-         | 1.08E-05                   |
| 4   | rs1595665  | 161630317 | -                | t/c                 | 1.02 (0.99 - 1.05) | 0.24     | +---+---+?---?---?+---+---+   | 2.74E-02                   |
| 5   | rs17053082 | 155326808 | N/A              | t/c                 | 1.02 (0.98 - 1.06) | 0.26     | +++++?+---+?+---+?+---+       | 1.57E-05                   |
| 6   | rs11968879 | 150202935 | <i>LRP11</i>     | a/g                 | 1.02 (0.98 - 1.05) | 0.29     | +---+---?---+---+?+---+?-     | 1.54E-05                   |
| 3   | rs13066950 | 37428116  | <i>C3orf35</i>   | t/g                 | 1.01 (0.99 - 1.02) | 0.30     | +++++---+---+?+---+---+?-     | 8.34E-02                   |
| 20  | rs1967678  | 2312386   | <i>TGM6</i>      | t/c                 | 1.03 (0.98 - 1.08) | 0.31     | +++++---+---+?+---+?+---?     | 1.78E-02                   |
| 14  | rs1257906  | 97748922  | -                | a/g                 | 1.01 (0.99 - 1.03) | 0.39     | +++++---+---+?+---+---+---    | 2.76E-01                   |
| 13  | rs9552911  | 22762657  | <i>SGCG</i>      | a/g                 | 1.01 (0.99 - 1.03) | 0.49     | ---+---+---+?+---+?+---+      | 1.05E-03                   |
| 3   | rs6443876  | 184553100 | <i>MCF2L2</i>    | t/c                 | 1.01 (0.99 - 1.03) | 0.50     | +---+---+?---?---+---+?+---+  | 2.16E-02                   |
| 6   | rs9494335  | 136053557 | <i>C6orf217</i>  | a/g                 | 1.00 (0.98 - 1.01) | 0.53     | ---+---+---+?---?---+---+---+ | 3.62E-03                   |
| 2   | rs11683782 | 30384693  | -                | a/c                 | 1.00 (0.98 - 1.01) | 0.56     | ---+---+---+?---+---+?+---+   | 1.65E-03                   |
| 16  | rs11862438 | 82879154  | <i>WFDC1</i>     | c/g                 | 1.00 (0.98 - 1.03) | 0.71     | -----+---+?---+?+---+---+     | 3.17E-02                   |
| 6   | rs6904271  | 109822899 | <i>PPIL6</i>     | c/g                 | 1.00 (0.97 - 1.04) | 0.79     | -+---+---+?+---+?+---+---     | 3.40E-05                   |
| 14  | rs242387   | 55661157  | <i>PELI2</i>     | a/g                 | 1.00 (0.98 - 1.01) | 0.84     | -----+---+---+?+---+---+---   | 2.09E-03                   |

SUPPLEMENTARY DATA

|    |            |           |                |     |                    |      |                           |          |
|----|------------|-----------|----------------|-----|--------------------|------|---------------------------|----------|
| 15 | rs12595602 | 57257509  | <i>MIR2116</i> | t/c | 1.00 (0.95 - 1.04) | 0.86 | +++++---?++++?+++?+----?  | 2.11E-03 |
| 8  | rs4527850  | 134266031 | <i>WISP1</i>   | t/c | 1.00 (0.99 - 1.02) | 0.90 | +++++++-+---?+---+---+--- | 1.70E-02 |
| 7  | rs6461477  | 20086589  | -              | a/g | 1.00 (0.98 - 1.02) | 0.92 | -----+??-?+-----?+---     | 7.39E-04 |

Supplementary Table 11. Association of SNPs near *SGCG* locus (chr 13q12) with T2D-related quantitative traits

|                     | rs9552911 |                        |         |                       | rs572303  |                        |         |                        | rs1410518 |                        |         |                        | rs6490820 |                       |         |                        | rs7319884 |                        |         |                        | rs9553022 |                        |       |                        |
|---------------------|-----------|------------------------|---------|-----------------------|-----------|------------------------|---------|------------------------|-----------|------------------------|---------|------------------------|-----------|-----------------------|---------|------------------------|-----------|------------------------|---------|------------------------|-----------|------------------------|-------|------------------------|
|                     | unadj     |                        | adj     |                       | unadj     |                        | adj     |                        | unadj     |                        | adj     |                        | unadj     |                       | adj     |                        | unadj     |                        | adj     |                        | unadj     |                        | adj   |                        |
|                     | $\beta$   | P                      | $\beta$ | P                     | $\beta$   | P                      | $\beta$ | P                      | $\beta$   | P                      | $\beta$ | P                      | $\beta$   | P                     | $\beta$ | P                      | $\beta$   | P                      | $\beta$ | P                      | $\beta$   | P                      |       |                        |
| BMI                 | -0.24     | 0.184                  | -0.15   | 0.379                 | 0.15      | 0.443                  | 0.17    | 0.395                  | 0.08      | 0.753                  | 0.14    | 0.572                  | -0.91     | 0.478                 | -0.20   | 0.446                  | 0.32      | 5.30 x10 <sup>-2</sup> | 0.36    | 3.05 x10 <sup>-2</sup> | -0.04     | 0.801                  | -0.05 | 0.761                  |
| Waist (cm)          | -1.03     | 1.81x10 <sup>-1</sup>  | -0.31   | 5.73x10 <sup>-1</sup> | 0.84      | 0.080                  | 0.67    | 5.20 x10 <sup>-2</sup> | 0.80      | 0.191                  | 0.69    | 0.115                  | 0.51      | 0.415                 | 0.93    | 3.80 x10 <sup>-2</sup> | 0.92      | 2.30 x10 <sup>-2</sup> | 0.35    | 0.231                  | 0.04      | 0.910                  | 0.10  | 0.713                  |
| WHR                 | -0.01     | 5.00 x10 <sup>-3</sup> | 0.00    | 0.252                 | 0.01      | 5.30 x10 <sup>-2</sup> | 0.01    | 0.068                  | 0.01      | 5.10 x10 <sup>-2</sup> | 0.01    | 4.80 x10 <sup>-2</sup> | 0.00      | 0.269                 | 0.01    | 0.106                  | 0.00      | 0.597                  | 0.00    | 0.645                  | 0.00      | 0.715                  | 0.00  | 0.645                  |
| SYSBP (mmHG)        | -2.94     | 5.00 x10 <sup>-3</sup> | -1.53   | 0.130                 | 0.87      | 0.383                  | 0.60    | 0.516                  | 0.88      | 0.492                  | 0.93    | 0.424                  | 2.22      | 0.088                 | 1.93    | 0.106                  | 0.25      | 0.759                  | 0.12    | 0.872                  | -1.47     | 0.071                  | -1.98 | 8.00 x10 <sup>-3</sup> |
| DYSBP (mmHG)        | -2.37     | 5.81x10 <sup>-3</sup>  | -1.87   | 2.40x10 <sup>-2</sup> | 0.98      | 0.070                  | 0.89    | 0.089                  | 1.47      | 3.20 x10 <sup>-2</sup> | 1.59    | 1.70 x10 <sup>-2</sup> | 0.56      | 0.425                 | 0.83    | 0.226                  | -0.53     | 0.237                  | -0.71   | 0.103                  | -0.89     | 4.40 x10 <sup>-2</sup> | -0.91 | 3.20 x10 <sup>-2</sup> |
| FBG (mg/dL)         | -6.03     | 1.78x10 <sup>-1</sup>  | -1.65   | 6.49x10 <sup>-1</sup> | 0.38      | 0.892                  | 1.10    | 0.620                  | -0.73     | 0.836                  | 3.59    | 0.204                  | -2.84     | 0.434                 | -1.62   | 0.579                  | -2.46     | 0.289                  | -1.07   | 0.564                  | -1.31     | 0.571                  | -0.53 | 0.774                  |
| Homa IR             | -0.36     | 2.03x10 <sup>-1</sup>  | -0.29   | 3.07x10 <sup>-1</sup> | 0.13      | 0.468                  | 0.15    | 0.400                  | 0.03      | 0.896                  | 0.11    | 0.619                  | -0.02     | 0.926                 | 0.04    | 0.853                  | 0.12      | 0.395                  | 0.12    | 0.413                  | -0.09     | 0.544                  | -0.09 | 0.554                  |
| Homa B              | 10.45     | 0.150                  | 1.86    | 0.795                 | 8.36      | 0.384                  | 6.91    | 0.455                  | 5.08      | 0.676                  | -1.02   | 0.931                  | -1.04     | 0.934                 | -3.30   | 0.788                  | -3.99     | 0.623                  | -4.09   | 0.601                  | 2.71      | 0.731                  | 1.33  | 0.861                  |
| Cholesterol (mg/dL) | 0.02      | 2.70 x10 <sup>-2</sup> | 0.02    | 0.176                 | -0.39     | 0.862                  | -0.47   | 0.833                  | -1.35     | 0.635                  | -1.15   | 0.685                  | 1.49      | 0.613                 | 1.27    | 0.664                  | 0.15      | 0.937                  | 0.06    | 0.975                  | 1.06      | 0.565                  | 1.08  | 0.554                  |
| HDL (mg/dL)         | 0.15      | 0.804                  | -0.12   | 0.840                 | 0.12      | 0.834                  | 0.05    | 0.923                  | -0.51     | 0.48                   | -0.64   | 0.369                  | -0.03     | 0.968                 | -0.22   | 0.757                  | -0.04     | 0.941                  | -0.08   | 0.859                  | -0.02     | 0.958                  | -0.07 | 0.879                  |
| LDL (mg/dL)         | 0.44      | 0.783                  | -0.11   | 0.944                 | 0.01      | 0.996                  | -0.16   | 0.922                  | -0.26     | 0.899                  | -0.37   | 0.856                  | 0.46      | 0.83                  | -0.09   | 0.967                  | -0.04     | 0.979                  | -0.14   | 0.918                  | 0.88      | 0.504                  | 0.60  | 0.651                  |
| TG (mg/dL)          | 1.72      | 0.688                  | 5.32    | 0.213                 | 0.98      | 0.840                  | 1.34    | 0.782                  | 5.64      | 0.348                  | 6.81    | 0.259                  | 4.69      | 0.458                 | 5.93    | 0.349                  | -0.85     | 0.834                  | -0.92   | 0.82                   | 6.77      | 0.081                  | 7.02  | 0.071                  |
|                     | rs1359426 |                        |         |                       | rs1359978 |                        |         |                        | rs1570979 |                        |         |                        | rs1886972 |                       |         |                        | rs7319884 |                        |         |                        | rs7996675 |                        |       |                        |
|                     | unadj     |                        | adj     |                       | unadj     |                        | adj     |                        | unadj     |                        | adj     |                        | unadj     |                       | adj     |                        | unadj     |                        | adj     |                        | unadj     |                        | adj   |                        |
|                     | $\beta$   | P                      | $\beta$ | P                     | $\beta$   | P                      | $\beta$ | P                      | $\beta$   | P                      | $\beta$ | P                      | $\beta$   | P                     | $\beta$ | P                      | $\beta$   | P                      | $\beta$ | P                      | $\beta$   | P                      |       |                        |
| BMI                 | 0.07      | 0.782                  | 0.05    | 0.830                 | 0.09      | 0.751                  | 0.06    | 0.820                  | -0.65     | 0.328                  | -0.56   | 0.399                  | -0.81     | 0.202                 | -0.70   | 0.267                  | -0.22     | 0.370                  | -0.25   | 0.305                  | -0.23     | 0.348                  | -0.26 | 0.279                  |
| Waist (cm)          | -0.47     | 0.428                  | -0.33   | 0.571                 | 0.84      | 0.238                  | 0.98    | 0.157                  | -1.20     | 0.495                  | -1.22   | 0.478                  | -1.47     | 0.382                 | -1.57   | 0.338                  | -0.43     | 0.484                  | -0.45   | 0.451                  | -0.52     | 0.392                  | -0.53 | 0.378                  |
| WHR                 | 0.00      | 0.923                  | 0.00    | 0.711                 | 0.01      | 0.012                  | 0.01    | 1.95x10 <sup>-3</sup>  | 0.00      | 0.767                  | -0.01   | 0.589                  | -0.01     | 0.635                 | -0.01   | 0.498                  | 0.00      | 0.929                  | 0.00    | 0.921                  | 0.00      | 0.771                  | 0.00  | 0.946                  |
| SYSBP (mmHG)        | 2.11      | 0.068                  | 2.40    | 2.48x10 <sup>-2</sup> | 0.85      | 0.534                  | 0.70    | 0.579                  | 1.14      | 0.726                  | 2.21    | 0.463                  | 1.22      | 0.694                 | 2.54    | 0.374                  | -1.98     | 0.093                  | -2.11   | 0.054                  | -2.07     | 0.080                  | -2.14 | 0.051                  |
| DYSBP (mmHG)        | 0.59      | 0.364                  | 0.62    | 0.321                 | 1.38      | 0.068                  | 1.30    | 0.074                  | -1.01     | 0.581                  | -0.78   | 0.657                  | -3.42     | 0.053                 | -3.05   | 0.072                  | -0.94     | 0.165                  | -0.56   | 0.389                  | -1.01     | 0.132                  | -0.51 | 0.342                  |
| FBG (mg/dL)         | -0.02     | 7.09x10 <sup>-4</sup>  | -0.02   | 1.14x10 <sup>-3</sup> | 0.00      | 0.814                  | 0.00    | 0.872                  | -0.08     | 2.03x10 <sup>-5</sup>  | -0.08   | 1.62x10 <sup>-5</sup>  | -0.08     | 2.34x10 <sup>-5</sup> | -0.08   | 2.02x10 <sup>-5</sup>  | 0.02      | 5.28x10 <sup>-4</sup>  | 0.02    | 2.27x10 <sup>-4</sup>  | 0.02      | 5.77x10 <sup>-4</sup>  | 0.02  | 2.43x10 <sup>-4</sup>  |
| Homa IR             | -0.05     | 0.381                  | -0.05   | 0.337                 | -0.01     | 0.907                  | -0.01   | 0.933                  | -0.27     | 0.090                  | -0.28   | 0.081                  | -0.24     | 0.122                 | -0.25   | 0.115                  | 0.04      | 0.504                  | 0.05    | 0.419                  | 0.04      | 0.503                  | 0.05  | 0.413                  |
| Homa B              | 0.04      | 0.478                  | 0.04    | 0.573                 | 0.02      | 0.819                  | 0.01    | 0.886                  | -0.04     | 0.859                  | -0.04   | 0.829                  | -0.03     | 0.896                 | -0.03   | 0.869                  | -0.09     | 0.160                  | -0.08   | 0.226                  | -0.09     | 0.166                  | -0.08 | 0.231                  |
| Cholesterol (mg/dL) | 0.00      | 0.815                  | 0.00    | 0.978                 | -0.01     | 0.492                  | -0.02   | 0.337                  | 0.01      | 0.888                  | 0.02    | 0.743                  | 0.03      | 0.467                 | 0.05    | 0.294                  | -0.02     | 0.178                  | -0.02   | 0.206                  | -0.02     | 0.179                  | -0.02 | 0.203                  |
| HDL (mg/dL)         | 0.00      | 0.928                  | -0.01   | 0.673                 | 0.01      | 0.786                  | 0.00    | 0.995                  | 0.03      | 0.640                  | 0.04    | 0.547                  | 0.03      | 0.574                 | 0.05    | 0.419                  | 0.01      | 0.629                  | 0.01    | 0.653                  | 0.01      | 0.659                  | 0.01  | 0.696                  |
| LDL (mg/dL)         | 0.01      | 0.623                  | 0.01    | 0.683                 | -0.01     | 0.686                  | -0.01   | 0.548                  | -0.02     | 0.751                  | -0.02   | 0.797                  | 0.02      | 0.760                 | 0.03    | 0.649                  | -0.02     | 0.443                  | -0.02   | 0.436                  | -0.02     | 0.447                  | -0.02 | 0.434                  |
| TG (mg/dL)          | 0.04      | 0.107                  | 0.04    | 0.102                 | -0.01     | 0.827                  | -0.01   | 0.849                  | -0.08     | 0.330                  | -0.07   | 0.369                  | -0.05     | 0.546                 | -0.04   | 0.622                  | -0.05     | 0.041                  | -0.05   | 0.057                  | -0.05     | 0.043                  | -0.05 | 0.060                  |

rs9552911, rs572303, rs1410518 *SGCG*; rs9553022 *TNFRSF19*; rs6490820, rs7319884 *MIPEP*. Analysis for fasting blood glucose was performed in controls.

SUPPLEMENTARY DATA

**Supplementary Table 12.** eQTL analysis showing significant cis-association ( $P \leq 10^{-4}$ ) between SNPs 1 Mb around lead SNP in *SGCG*

| Gene | SNP        | TSS      | TSE      | INFO  | SNP_Coor | A1 | Freq1 | Adipose |        |                 | Skin    |        |          | LCL      |        |          |          |
|------|------------|----------|----------|-------|----------|----|-------|---------|--------|-----------------|---------|--------|----------|----------|--------|----------|----------|
|      |            |          |          |       |          |    |       | $\beta$ | SE     | P eQTL          | $\beta$ | SE     | P eQTL   | $\beta$  | SE     | P eQTL   |          |
| SGCG | rs2225833  | 22653059 | 22797304 | 0.969 | 22647741 | C  | 0.633 | 0.092   | 0.0155 | <b>2.86E-09</b> | 0.0421  | 0.0122 | 5.73E-04 | -        | 0.0004 | 0.005    | 9.36E-01 |
| SGCG | rs1753096  | 22653059 | 22797304 | 0.993 | 22776547 | G  | 0.193 | -0.1144 | 0.0193 | <b>3.18E-09</b> | -       | 0.0011 | 0.0147   | 9.40E-01 | 0.0005 | 0.0061   | 9.37E-01 |
| SGCG | rs1753097  | 22653059 | 22797304 | 0.999 | 22776686 | G  | 0.193 | -0.1141 | 0.0193 | <b>3.20E-09</b> | -       | 0.0009 | 0.0147   | 9.50E-01 | 0.0004 | 0.0061   | 9.49E-01 |
| SGCG | rs497691   | 22653059 | 22797304 | 0.987 | 22775923 | G  | 0.807 | 0.1143  | 0.0193 | <b>3.38E-09</b> | 0.0014  | 0.0147 | 9.24E-01 | -        | 0.0005 | 0.0061   | 9.31E-01 |
| SGCG | rs17078394 | 22653059 | 22797304 | 0.961 | 22651669 | T  | 0.192 | -0.1068 | 0.0181 | <b>3.87E-09</b> | -       | 0.0494 | 0.0141   | 4.61E-04 | 0.0034 | 0.0058   | 5.59E-01 |
| SGCG | rs529005   | 22653059 | 22797304 | 0.892 | 22643070 | T  | 0.638 | 0.0917  | 0.0157 | <b>5.55E-09</b> | 0.0439  | 0.0124 | 3.93E-04 | -        | 0.0002 | 0.0051   | 9.64E-01 |
| SGCG | rs577379   | 22653059 | 22797304 | 0.997 | 22653788 | G  | 0.532 | 0.0862  | 0.0153 | <b>1.78E-08</b> | 0.028   | 0.0122 | 2.14E-02 | -        | 0.0024 | 0.005    | 6.33E-01 |
| SGCG | rs4770402  | 22653059 | 22797304 | 0.987 | 22652744 | T  | 0.536 | 0.085   | 0.0154 | <b>3.46E-08</b> | 0.0274  | 0.0123 | 2.53E-02 | -        | 0.0021 | 0.005    | 6.70E-01 |
| SGCG | rs9550961  | 22653059 | 22797304 | 0.846 | 22848277 | G  | 0.47  | -0.0871 | 0.0162 | <b>7.35E-08</b> | -       | 0.0148 | 0.0128   | 2.47E-01 | 0.0052 | 0.0052   | 3.22E-01 |
| SGCG | rs4770437  | 22653059 | 22797304 | 0.836 | 22849626 | T  | 0.465 | -0.0855 | 0.0162 | <b>1.32E-07</b> | -       | 0.0148 | 0.0128   | 2.45E-01 | 0.0052 | 0.0053   | 3.21E-01 |
| SGCG | rs1800353  | 22653059 | 22797304 | 0.882 | 22796509 | T  | 0.319 | -0.0871 | 0.0171 | <b>3.36E-07</b> | -       | 0.0185 | 0.0133   | 1.64E-01 | 0.0015 | 0.0055   | 7.91E-01 |
| SGCG | rs3794370  | 22653059 | 22797304 | 0.999 | 22654627 | T  | 0.51  | -0.0767 | 0.0151 | <b>3.52E-07</b> | -       | 0.0141 | 0.0119   | 2.38E-01 | 0.0036 | 0.0049   | 4.56E-01 |
| SGCG | rs3764064  | 22653059 | 22797304 | 0.953 | 22651104 | T  | 0.269 | -0.0823 | 0.0165 | <b>6.42E-07</b> | -       | 0.0477 | 0.0131   | 2.67E-04 | 0.003  | 0.0053   | 5.69E-01 |
| SGCG | rs9317535  | 22653059 | 22797304 | 0.992 | 22653892 | G  | 0.733 | 0.0796  | 0.0163 | <b>1.00E-06</b> | 0.0473  | 0.0129 | 2.45E-04 | -        | 0.0033 | 0.0052   | 5.31E-01 |
| SGCG | rs2182497  | 22653059 | 22797304 | 0.866 | 22855488 | T  | 0.105 | -0.124  | 0.0259 | <b>1.73E-06</b> | -       | 0.0052 | 0.0204   | 7.99E-01 | -0.004 | 0.0084   | 6.33E-01 |
| SGCG | rs11619233 | 22653059 | 22797304 | 0.898 | 22857999 | G  | 0.893 | 0.1218  | 0.026  | <b>2.70E-06</b> | 0.0039  | 0.0204 | 8.49E-01 | 0.0068   | 0.0084 | 4.20E-01 |          |
| SGCG | rs2709235  | 22653059 | 22797304 | 0.888 | 22854140 | T  | 0.889 | 0.1185  | 0.0254 | <b>2.99E-06</b> | 0.0013  | 0.02   | 9.49E-01 | 0.0042   | 0.0082 | 6.10E-01 |          |
| SGCG | rs12871934 | 22653059 | 22797304 | 0.996 | 22749568 | G  | 0.116 | -0.1047 | 0.0226 | <b>3.63E-06</b> | -       | 0.0152 | 0.0175   | 3.85E-01 | -      | 0.0079   | 2.69E-01 |
| SGCG | rs17315411 | 22653059 | 22797304 | 0.995 | 22749106 | G  | 0.116 | -0.1047 | 0.0226 | <b>3.63E-06</b> | -       | 0.0152 | 0.0175   | 3.85E-01 | -      | 0.0079   | 2.69E-01 |

SUPPLEMENTARY DATA

|      |            |          |          |       |          |   |       |         |        |                 |        |        |          |        |        |          |
|------|------------|----------|----------|-------|----------|---|-------|---------|--------|-----------------|--------|--------|----------|--------|--------|----------|
| SGCG | rs17315474 | 22653059 | 22797304 | 0.996 | 22749430 | T | 0.116 | -0.1047 | 0.0226 | <b>3.63E-06</b> | -      | 0.0175 | 3.85E-01 | -      | 0.0072 | 2.69E-01 |
| SGCG | rs17315901 | 22653059 | 22797304 | 0.996 | 22758285 | T | 0.884 | 0.1047  | 0.0226 | <b>3.63E-06</b> | 0.0153 | 0.0175 | 3.84E-01 | 0.0079 | 0.0072 | 2.69E-01 |
| SGCG | rs12872214 | 22653059 | 22797304 | 0.996 | 22749716 | G | 0.116 | -0.1047 | 0.0226 | <b>3.64E-06</b> | -      | 0.0175 | 3.85E-01 | -      | 0.0072 | 2.69E-01 |
| SGCG | rs12875241 | 22653059 | 22797304 | 0.996 | 22750526 | G | 0.884 | 0.1047  | 0.0226 | <b>3.64E-06</b> | 0.0152 | 0.0175 | 3.85E-01 | 0.0079 | 0.0072 | 2.69E-01 |
| SGCG | rs17374896 | 22653059 | 22797304 | 0.996 | 22751700 | T | 0.116 | -0.1047 | 0.0226 | <b>3.64E-06</b> | -      | 0.0175 | 3.85E-01 | -      | 0.0072 | 2.69E-01 |
| SGCG | rs12864851 | 22653059 | 22797304 | 0.999 | 22760901 | T | 0.116 | -0.1046 | 0.0226 | <b>3.68E-06</b> | -      | 0.0175 | 3.78E-01 | -      | 0.0072 | 2.48E-01 |
| SGCG | rs17316242 | 22653059 | 22797304 | 0.994 | 22761137 | T | 0.116 | -0.1047 | 0.0226 | <b>3.70E-06</b> | -      | 0.0175 | 3.80E-01 | -      | 0.0072 | 2.62E-01 |
| SGCG | rs1536365  | 22653059 | 22797304 | 0.931 | 22827095 | T | 0.884 | 0.1146  | 0.025  | <b>4.42E-06</b> | 0.0008 | 0.0193 | 9.68E-01 | 0.0076 | 0.008  | 3.46E-01 |
| SGCG | rs2031640  | 22653059 | 22797304 | 0.93  | 22828055 | T | 0.116 | -0.1145 | 0.025  | <b>4.56E-06</b> | -      | 0.0193 | 9.69E-01 | -      | 0.008  | 3.42E-01 |
| SGCG | rs9552923  | 22653059 | 22797304 | 0.963 | 22790786 | G | 0.464 | 0.069   | 0.0152 | <b>5.23E-06</b> | 0.0061 | 0.0119 | 6.11E-01 | -      | 0.0049 | 2.53E-01 |
| SGCG | rs2050578  | 22653059 | 22797304 | 0.968 | 22649626 | G | 0.667 | 0.0694  | 0.0154 | <b>6.28E-06</b> | 0.029  | 0.0122 | 1.75E-02 | -      | 0.005  | 5.66E-01 |
| SGCG | rs1409497  | 22653059 | 22797304 | 1     | 22815281 | G | 0.093 | -0.1192 | 0.0267 | <b>8.22E-06</b> | -      | 0.0206 | 4.60E-01 | -      | 0.0086 | 7.54E-01 |
| SGCG | rs4770434  | 22653059 | 22797304 | 0.994 | 22816177 | T | 0.907 | 0.1193  | 0.0268 | <b>8.32E-06</b> | 0.0151 | 0.0206 | 4.65E-01 | 0.0024 | 0.0086 | 7.77E-01 |
| SGCG | rs9552932  | 22653059 | 22797304 | 0.982 | 22821893 | G | 0.46  | 0.0657  | 0.0149 | <b>1.10E-05</b> | 0.0038 | 0.0118 | 7.46E-01 | -      | 0.0048 | 2.60E-01 |
| SGCG | rs2737700  | 22653059 | 22797304 | 0.988 | 22806034 | G | 0.461 | 0.0653  | 0.0149 | <b>1.17E-05</b> | 0.0041 | 0.0117 | 7.26E-01 | -      | 0.0048 | 2.53E-01 |
| SGCG | rs4770433  | 22653059 | 22797304 | 0.996 | 22801791 | G | 0.464 | 0.065   | 0.0148 | <b>1.20E-05</b> | 0.0042 | 0.0117 | 7.18E-01 | -      | 0.0048 | 2.65E-01 |
| SGCG | rs518727   | 22653059 | 22797304 | 0.898 | 22784236 | T | 0.487 | -0.0684 | 0.0156 | <b>1.22E-05</b> | -      | 0.0124 | 7.14E-01 | 0.007  | 0.005  | 1.65E-01 |
| SGCG | rs4770431  | 22653059 | 22797304 | 0.973 | 22793151 | T | 0.092 | -0.1184 | 0.0273 | <b>1.40E-05</b> | -      | 0.021  | 4.72E-01 | -      | 0.0088 | 9.39E-01 |
| SGCG | rs2031641  | 22653059 | 22797304 | 0.97  | 22828245 | G | 0.908 | 0.1179  | 0.0272 | <b>1.49E-05</b> | 0.0151 | 0.021  | 4.73E-01 | 0.0009 | 0.0088 | 9.16E-01 |
| SGCG | rs10507329 | 22653059 | 22797304 | 0.968 | 22830133 | T | 0.092 | -0.118  | 0.0273 | <b>1.50E-05</b> | -      | 0.021  | 4.74E-01 | -      | 0.0088 | 9.18E-01 |
| SGCG | rs1415130  | 22653059 | 22797304 | 0.926 | 22651879 | T | 0.269 | -0.0704 | 0.0167 | <b>2.63E-05</b> | -      | 0.0132 | 1.52E-04 | 0.003  | 0.0054 | 5.80E-01 |
| SGCG | rs7333173  | 22653059 | 22797304 | 0.881 | 22648385 | G | 0.761 | -0.0744 | 0.0177 | <b>2.75E-05</b> | -0.002 | 0.0141 | 8.85E-01 | 0.0064 | 0.0057 | 2.65E-01 |
| SGCG | rs9580556  | 22653059 | 22797304 | 0.881 | 22645255 | T | 0.238 | 0.0744  | 0.0178 | <b>2.90E-05</b> | 0.0022 | 0.0141 | 8.75E-01 | -      | 0.0058 | 2.62E-01 |

SUPPLEMENTARY DATA

|             |                 |                 |                 |              |                 |          |              |                |               |                 |                           |              |                 |               |               |                 |
|-------------|-----------------|-----------------|-----------------|--------------|-----------------|----------|--------------|----------------|---------------|-----------------|---------------------------|--------------|-----------------|---------------|---------------|-----------------|
| SGCG        | rs510407        | 22653059        | 22797304        | 0.931        | 22688992        | G        | 0.241        | 0.0702         | 0.0172        | <b>4.37E-05</b> | 0.0003                    | 0.0139       | 9.85E-01        | 0             | 0.0056        | 9.97E-01        |
| <b>SGCG</b> | <b>rs572303</b> | <b>22653059</b> | <b>22797304</b> | <b>0.999</b> | <b>22684773</b> | <b>T</b> | <b>0.293</b> | <b>-0.0565</b> | <b>0.0163</b> | <b>5.47E-04</b> | <b>-</b><br><b>0.0193</b> | <b>0.013</b> | <b>1.37E-01</b> | <b>0.0029</b> | <b>0.0053</b> | <b>5.81E-01</b> |
| TNFRSF19    | rs9507129       | 23051638        | 23141412        | 0.965        | 23117423        | G        | 0.285        | -0.0131        | 0.0062        | 3.35E-02        | -                         | 0.0067       | <b>1.51E-05</b> | 0.0001        | 0.0063        | 9.89E-01        |
| TNFRSF19    | rs3794348       | 23051638        | 23141412        | 0.987        | 23110954        | T        | 0.714        | 0.0128         | 0.006         | 3.40E-02        | 0.028                     | 0.0065       | <b>1.81E-05</b> | -             | 0.0061        | 8.48E-01        |
| TNFRSF19    | rs3794347       | 23051638        | 23141412        | 0.988        | 23113236        | T        | 0.714        | 0.0128         | 0.006         | 3.40E-02        | 0.028                     | 0.0065       | <b>1.83E-05</b> | -             | 0.0061        | 8.49E-01        |
| TNFRSF19    | rs9507128       | 23051638        | 23141412        | 0.99         | 23115092        | T        | 0.298        | -0.0103        | 0.0059        | 8.20E-02        | -                         | 0.0064       | <b>2.14E-05</b> | 0.0016        | 0.006         | 7.96E-01        |
| TNFRSF19    | rs9507127       | 23051638        | 23141412        | 0.991        | 23114955        | T        | 0.702        | 0.0103         | 0.0059        | 8.22E-02        | 0.0272                    | 0.0064       | <b>2.16E-05</b> | -             | 0.006         | 7.93E-01        |
| TNFRSF19    | rs7992255       | 23051638        | 23141412        | 0.957        | 23112813        | G        | 0.31         | -0.0102        | 0.0059        | 8.52E-02        | -                         | 0.0064       | <b>2.17E-05</b> | 0.0022        | 0.006         | 7.21E-01        |
| TNFRSF19    | rs12429914      | 23051638        | 23141412        | 0.992        | 23110486        | G        | 0.701        | 0.0102         | 0.0059        | 8.34E-02        | 0.0271                    | 0.0064       | <b>2.20E-05</b> | -             | 0.006         | 7.73E-01        |
| TNFRSF19    | rs1983958       | 23051638        | 23141412        | 0.93         | 23096460        | T        | 0.25         | -0.0091        | 0.0065        | 1.65E-01        | -                         | 0.007        | <b>2.24E-05</b> | -             | 0.0066        | 6.09E-01        |
| TNFRSF19    | rs12429900      | 23051638        | 23141412        | 0.992        | 23110353        | G        | 0.702        | 0.0102         | 0.0059        | 8.29E-02        | 0.0271                    | 0.0064       | <b>2.26E-05</b> | -             | 0.006         | 7.73E-01        |
| TNFRSF19    | rs9507126       | 23051638        | 23141412        | 0.993        | 23114033        | C        | 0.702        | 0.0102         | 0.0059        | 8.28E-02        | 0.0271                    | 0.0064       | <b>2.27E-05</b> | -             | 0.006         | 7.79E-01        |
| TNFRSF19    | rs9510793       | 23051638        | 23141412        | 0.993        | 23111120        | T        | 0.702        | 0.0102         | 0.0059        | 8.31E-02        | 0.027                     | 0.0064       | <b>2.31E-05</b> | -             | 0.006         | 7.71E-01        |
| TNFRSF19    | rs7991222       | 23051638        | 23141412        | 0.995        | 23112657        | C        | 0.702        | 0.0102         | 0.0059        | 8.33E-02        | 0.027                     | 0.0064       | <b>2.37E-05</b> | -             | 0.006         | 7.68E-01        |
| TNFRSF19    | rs9510788       | 23051638        | 23141412        | 0.979        | 23105224        | T        | 0.258        | -0.0093        | 0.0063        | 1.40E-01        | -                         | 0.0068       | <b>2.86E-05</b> | -             | 0.0064        | 6.13E-01        |
| TNFRSF19    | rs9510787       | 23051638        | 23141412        | 0.991        | 23103195        | G        | 0.26         | -0.0092        | 0.0063        | 1.45E-01        | -                         | 0.0067       | <b>3.07E-05</b> | -             | 0.0064        | 6.03E-01        |
| TNFRSF19    | rs7989882       | 23051638        | 23141412        | 0.999        | 23112603        | G        | 0.7          | 0.0103         | 0.0059        | 7.81E-02        | 0.0264                    | 0.0064       | <b>3.19E-05</b> | -0.002        | 0.006         | 7.39E-01        |
| TNFRSF19    | rs4400900       | 23051638        | 23141412        | 0.929        | 23089203        | G        | 0.747        | 0.0096         | 0.0065        | 1.40E-01        | 0.029                     | 0.007        | <b>3.39E-05</b> | 0.0032        | 0.0066        | 6.28E-01        |
| TNFRSF19    | rs12584129      | 23051638        | 23141412        | 0.977        | 23101273        | T        | 0.258        | -0.0089        | 0.0063        | 1.58E-01        | -                         | 0.0068       | <b>3.44E-05</b> | -             | 0.0064        | 5.96E-01        |
| TNFRSF19    | rs1983957       | 23051638        | 23141412        | 0.964        | 23098532        | T        | 0.743        | 0.0092         | 0.0064        | 1.47E-01        | 0.0283                    | 0.0068       | <b>3.62E-05</b> | 0.0034        | 0.0065        | 5.96E-01        |
| SGCG        | rs4769245       | 22653059        | 22797304        | 0.998        | 22703627        | G        | 0.772        | -0.0126        | 0.0177        | 4.75E-01        | -                         | 0.0138       | <b>4.16E-05</b> | -             | 0.0058        | 1.38E-01        |
| TNFRSF19    | rs9510790       | 23051638        | 23141412        | 0.962        | 23107302        | T        | 0.254        | -0.0091        | 0.0064        | 1.57E-01        | -                         | 0.0069       | <b>4.77E-05</b> | -             | 0.0065        | 5.64E-01        |

SUPPLEMENTARY DATA

|          |            |          |          |       |          |   |       |         |        |          |             |        |                 |             |        |                 |
|----------|------------|----------|----------|-------|----------|---|-------|---------|--------|----------|-------------|--------|-----------------|-------------|--------|-----------------|
|          |            |          |          |       |          |   |       |         |        |          | 0.0279      |        |                 | 0.0038      |        |                 |
| SGCG     | rs9580573  | 22653059 | 22797304 | 0.92  | 22682242 | C | 0.229 | 0.0061  | 0.0179 | 7.32E-01 | 0.0564      | 0.014  | <b>5.78E-05</b> | 0.0089      | 0.0058 | 1.26E-01        |
| SGCG     | rs4770411  | 22653059 | 22797304 | 0.92  | 22681140 | T | 0.771 | -0.0061 | 0.0179 | 7.32E-01 | -<br>0.0564 | 0.014  | <b>5.78E-05</b> | -<br>0.0089 | 0.0058 | 1.26E-01        |
| SGCG     | rs1887757  | 22653059 | 22797304 | 0.922 | 22686362 | T | 0.229 | 0.0063  | 0.0179 | 7.24E-01 | 0.0562      | 0.014  | <b>6.05E-05</b> | 0.009       | 0.0058 | 1.25E-01        |
| TNFRSF19 | rs1575666  | 23051638 | 23141412 | 0.934 | 23120688 | C | 0.707 | 0.0129  | 0.0062 | 3.70E-02 | 0.0265      | 0.0067 | <b>7.54E-05</b> | 0           | 0.0063 | 1.00E+00        |
| TNFRSF19 | rs12585977 | 23051638 | 23141412 | 0.962 | 23138151 | T | 0.684 | 0.0101  | 0.006  | 8.94E-02 | 0.0254      | 0.0064 | <b>8.15E-05</b> | 0.0019      | 0.0061 | 7.50E-01        |
| TNFRSF19 | rs3794344  | 23051638 | 23141412 | 0.964 | 23130708 | G | 0.304 | -0.0125 | 0.006  | 3.80E-02 | -<br>0.0256 | 0.0065 | <b>8.66E-05</b> | -<br>0.0014 | 0.0062 | 8.17E-01        |
| TNFRSF19 | rs1034068  | 23051638 | 23141412 | 0.96  | 23128811 | G | 0.685 | 0.0102  | 0.006  | 8.81E-02 | 0.0253      | 0.0064 | <b>8.69E-05</b> | 0.0009      | 0.0061 | 8.84E-01        |
| TNFRSF19 | rs9507136  | 23051638 | 23141412 | 0.958 | 23127353 | G | 0.686 | 0.0102  | 0.006  | 8.66E-02 | 0.0252      | 0.0065 | <b>9.37E-05</b> | 0.0005      | 0.0061 | 9.34E-01        |
| TNFRSF19 | rs9510800  | 23051638 | 23141412 | 0.972 | 23138285 | G | 0.304 | -0.0124 | 0.006  | 3.93E-02 | -<br>0.0253 | 0.0065 | <b>9.81E-05</b> | -<br>0.0021 | 0.0061 | 7.30E-01        |
| TNFRSF19 | rs679482   | 23051638 | 23141412 | 0.88  | 22663635 | C | 0.865 | 0.0005  | 0.0076 | 9.46E-01 | 0.015       | 0.0081 | 6.40E-02        | -<br>0.0302 | 0.0076 | <b>8.05E-05</b> |

SUPPLEMENTARY DATA

**Supplementary Table 13.** Details of the participating studies, samples, quality control, minor allele frequency of the *SGCG* variant (rs9552911), ORs and *P* values

|                          |           |                                 | N cases | N controls | Genotype call rate | Controls HWE P value | MAF cases | MAF controls | OR   | 95% CI L | 95% CI U | P value | Imputed |
|--------------------------|-----------|---------------------------------|---------|------------|--------------------|----------------------|-----------|--------------|------|----------|----------|---------|---------|
| <b>Ethnic Group</b>      |           | <b>STUDIES</b>                  |         |            |                    |                      |           |              |      |          |          |         |         |
| Punjabi Sikhs            | SDS/AIDHS | Discovery GWAS                  | 842     | 774        | 1.00               | 0.390                | 0.06      | 0.09         | 0.61 | 0.47     | 0.80     | 0.0003  |         |
| Punjabi Sikhs            |           | LOLIPOP Sikh GWAS               | 801     | 2017       | 1.00               | 0.876                | 0.07      | 0.08         | 0.75 | 0.58     | 0.96     | 0.021   |         |
| Punjabi Sikhs            |           | <i>De novo</i> Sikh Replication | 977     | 1493       | 0.97               | 0.049                | 0.06      | 0.09         | 0.66 | 0.53     | 0.82     | 0.0001  |         |
|                          |           | LOLIPOP non-Sikh South Asians   | 982     | 1741       | 99.95              | 0.380                | 0.11      | 0.11         | 0.95 | 0.78     | 1.16     | 0.621   |         |
| Pakistani South Asians   | PROMIS    | Others_GWAS1                    | 1468    | 3769       | 1.00               | 0.035                | 0.11      | 0.10         | 0.96 | 0.84     | 1.10     | 0.606   |         |
|                          |           | Punjabi_GWAS1                   | 641     | 1465       | 1.00               | 1.000                | 0.09      | 0.08         | 0.92 | 0.73     | 1.16     | 0.532   |         |
|                          |           | Others_GWAS2                    | 1736    | 1637       | 0.94               | 0.017                | 0.10      | 0.10         | 1.01 | 0.86     | 1.19     | 0.744   | yes     |
|                          |           | Punjabi_GWAS2                   | 1259    | 1074       | 0.94               | 0.580                | 0.08      | 0.09         | 0.92 | 0.75     | 1.13     | 0.432   | yes     |
|                          |           | Other_GWAS3                     | 864     | 710        | 0.94               | 0.241                | 0.12      | 0.11         | 1.12 | 0.90     | 1.40     | 0.379   | yes     |
|                          |           | Punjabi_GWAS3                   | 669     | 484        | 0.90               | 1.000                | 0.09      | 0.08         | 1.16 | 0.85     | 1.57     | 0.223   | yes     |
| Pakistani South Asians   | RACE      | RACE1_Other                     | 339     | 381        | 0.99               | 0.733                | 0.07      | 0.08         | 1.23 | 0.83     | 1.82     | 0.219   |         |
|                          |           | RACE1_Punjabi                   | 164     | 129        | 1.00               | 1.000                | 0.12      | 0.10         | 0.83 | 0.49     | 1.40     | 0.506   |         |
|                          |           | RACE2_Others                    | 561     | 752        | 0.94               | 1.000                | 0.11      | 0.11         | 1.02 | 0.79     | 1.30     | 0.735   | yes     |
|                          |           | RACE2_Punjabi                   | 523     | 775        | 0.92               | 0.070                | 0.10      | 0.09         | 1.17 | 0.90     | 1.53     | 0.299   | yes     |
| South Asians (Singapore) | SINDI     | Singapore Indian                | 973     | 1164       | 1.00               | 0.807                | 0.17      | 0.14         | 0.96 | 0.92     | 1.00     | 0.060   |         |
| East Asians              | RIKEN     | Japanese                        | 4455    | 2955       | 1.00               | 0.391                | 0.26      | 0.26         | 1.00 | 0.93     | 1.08     | 0.832   |         |
|                          |           | Singapore Chinese               | 1992    | 1941       | 0.99               | 0.931                | 0.23      | 0.24         | 0.94 | 0.84     | 1.06     | 0.323   |         |
|                          |           | Singapore Malay                 | 781     | 1234       | 1.00               | 0.333                | 0.26      | 0.26         | 0.99 | 0.96     | 1.02     | 0.544   |         |
|                          | AGEN      | Koreans, Chinese, Japanese      | 6952    | 11865      | NA                 | NA                   | NA        | NA           | 1.00 | 0.95     | 1.06     | 0.915   | NA      |
| Caucasians               | DIAGRAM   | Europeans, US whites            | 8130    | 38987      | NA                 | NA                   | NA        | NA           | NA   | NA       | NA       | NA      |         |

SUPPLEMENTARY DATA

**Supplementary Table 14.** Association results in the AIDHS/SDS discovery cohort for previously reported T2D loci

| SNP        | Chr | Pos       | Gene           | Alt | Risk | SDS RAF | SDS OR           | SDS P           | CEU RAF           | CEU OR            | CEU P    |
|------------|-----|-----------|----------------|-----|------|---------|------------------|-----------------|-------------------|-------------------|----------|
| rs10923931 | 1   | 120230001 | <i>NOTCH2</i>  | G   | T    | 0.22    | 1.21 (1.00-1.47) | 5.30E-02        | 0.12              | 1.13 (1.08-1.17)  | 4.00E-08 |
| rs243021   | 2   | 60496470  | <i>BCL11A</i>  | G   | A    | 0.53    | 1.10 (0.96-1.25) | 1.70E-01        | 0.46              | 1.08 (1.06-1.10)  | 3.00E-15 |
| rs3923113  | 2   | 165210095 | <i>GRB14</i>   | C   | A    | 0.73    | 1.06 (0.91-1.24) | 4.58E-01        | 0.74 <sup>‡</sup> | 1.09 (1.06-1.13)  | 1.00E-08 |
| rs2943641  | 2   | 226801989 | <i>IRS1</i>    | T   | C    | 0.72    | 1.20 (1.03-1.39) | 1.83E-02        | 0.65              | 1.19 (1.13-1.25)  | 9.28E-12 |
| rs7578326  | 2   | 226846158 | <i>IRS1</i>    | G   | A    | 0.76    | 1.09 (0.93-1.27) | 2.68E-01        | 0.64              | 1.11 (1.08-1.13)  | 5.00E-20 |
| rs7578597  | 2   | 43586327  | <i>THADA</i>   | C   | T    | 0.85    | 1.21 (0.58-2.51) | 6.05E-01        | 0.90              | 1.15 (1.10-1.20)  | 1.10E-09 |
| rs4607103  | 3   | 64686944  | <i>ADAMTS9</i> | T   | C    | -       | -                | -               | 0.76              | 1.09 (1.06-1.12)  | 1.00E-08 |
| rs6795735  | 3   | 64680405  | <i>ADAMTS9</i> | T   | C    | 0.31    | 1.04 (0.90-1.21) | 5.84E-01        | 0.54              | 1.09 (1.04-1.13)  | 8.40E-05 |
| rs4402960  | 3   | 186994381 | <i>IGF2BP2</i> | G   | T    | 0.45    | 1.21 (1.06-1.38) | <b>4.32E-03</b> | 0.30              | 1.14 (1.11-1.18)  | 8.90E-16 |
| rs1470579  | 3   | 187011782 | <i>IGF2BP2</i> | A   | C    | 0.39    | 1.29 (1.12-1.47) | <b>2.48E-04</b> | 0.29              | 1.14 (1.09-1.19)  | 2.20E-09 |
| rs1801282  | 3   | 12333125  | <i>PPARG</i>   | G   | C    | 0.87    | 0.12 (0.03-0.52) | <b>5.00E-03</b> | 0.82              | 1.14 (1.08-1.20)  | 1.70E-06 |
| rs13081389 | 3   | 12264800  | <i>PPARG</i>   | G   | A    | -       | -                | -               | 0.96              | 1.24 (1.14-1.35)  | 2.00E-07 |
| rs831571   | 3   | 64023337  | <i>PSMD6</i>   | T   | C    | 0.76    | 1.04 (0.89-1.21) | 6.57E-01        | 0.57 <sup>♯</sup> | 1.09 (1.06-1.12)  | 8.41E-11 |
| rs16861329 | 3   | 188149155 | <i>ST6GAL1</i> | A   | G    | 0.76    | 1.04 (0.89-1.21) | 6.63E-01        | 0.75 <sup>‡</sup> | 1.09 (1.06-1.12)  | 3.40E-08 |
| rs257108   | 3   | 188228830 | <i>ST6GAL1</i> | G   | A    | 0.38    | 1.23 (1.06-1.42) | 4.99E-03        | -                 | -                 | -        |
| rs9812056  | 3   | 23179028  | <i>UBE2E2</i>  | G   | A    | 0.78    | 1.27 (1.08-1.51) | <b>4.95E-03</b> | 0.84*             | 1.17 (1.11-1.24)* | 1.83E-08 |



SUPPLEMENTARY DATA

|            |   |           |                  |   |   |      |                  |                 |                   |                   |          |
|------------|---|-----------|------------------|---|---|------|------------------|-----------------|-------------------|-------------------|----------|
| rs7612463  | 3 | 23311454  | <i>UBE2E2</i>    | A | C | 0.77 | 1.28 (1.10-1.49) | <b>1.59E-03</b> | 0.84*             | 1.19 (1.12-1.26)* | 2.27E-09 |
| rs6780569  | 3 | 23173488  | <i>UBE2E2</i>    | A | G | 0.78 | 1.22 (1.04-1.43) | 1.36E-02        | 0.95*             | 1.21 (1.14-1.30)* | 6.76E-09 |
| rs10012946 | 4 | 6344251   | <i>WFS1</i>      | A | G | 0.70 | 1.31 (1.12-1.53) | <b>5.55E-04</b> | -                 | -                 | -        |
| rs1801214  | 4 | 6421094   | <i>WFS1</i>      | C | T | -    | -                | -               | 0.73              | 1.13 (1.08-1.18)  | 3.20E-08 |
| rs1001960  | 5 | 76406875  | <i>ZBED3</i>     | G | A | 0.29 | 1.06 (0.92-1.22) | 4.35E-01        | -                 | -                 | -        |
| rs4457053  | 5 | 76460705  | <i>ZBED3</i>     | A | G | -    | -                | -               | 0.26              | 1.16 (1.10-1.23)  | 4.20E-08 |
| rs7754840  | 6 | 20769229  | <i>CDKAL1</i>    | G | C | 0.27 | 1.09 (0.93-1.27) | 2.77E-01        | 0.36              | 1.12 (1.08-1.16)  | 4.10E-11 |
| rs10440833 | 6 | 20796100  | <i>CDKAL1</i>    | T | A | -    | -                | -               | 0.25              | 1.25 (1.20-1.31)  | 1.80E-22 |
| rs9470794  | 6 | 38214822  | <i>ZFAND3</i>    | T | C | 0.12 | 1.08 (0.88-1.34) | 4.67E-01        | 0.33 <sup>ϕ</sup> | 1.12 (1.08-1.16)  | 2.06E-10 |
| rs6467136  | 7 | 126952194 | <i>GCC1-PAX4</i> | A | G | 0.59 | 1.04 (0.91-1.19) | 5.68E-01        | 0.78 <sup>ϕ</sup> | 1.11 (1.07-1.14)  | 4.96E-11 |
| rs864745   | 7 | 28147081  | <i>JAZF1</i>     | C | T | 0.68 | 1.07 (0.90-1.26) | 4.70E-01        | 0.50              | 1.10 (1.07-1.13)  | 5.00E-14 |
| rs290794   | 7 | 130066934 | <i>KLF14</i>     | G | A | 0.22 | 1.03 (0.89-1.21) | 6.76E-01        | -                 | -                 | -        |
| rs972283   | 7 | 129924109 | <i>KLF14</i>     | A | G | -    | -                | -               | 0.55              | 1.07 (1.05-1.10)  | 2.00E-10 |
| rs13266634 | 8 | 118253964 | <i>SLC30A8</i>   | T | C | 0.73 | 1.03 (0.89-1.20) | 6.66E-01        | 0.61              | 1.12 (1.07-1.16)  | 5.30E-08 |
| rs2047962  | 8 | 118109252 | <i>SLC30A8</i>   | A | G | 0.57 | 0.87 (0.75-1.00) | 4.00E-02        | -                 | -                 | -        |
| rs896854   | 8 | 96029687  | <i>TP53INP1</i>  | C | T | 0.44 | 1.07 (0.93-1.23) | 3.32E-01        | 0.48              | 1.06 (1.04-1.09)  | 1.00E-09 |
| rs10965250 | 9 | 22123284  | <i>CDKN2A/B</i>  | A | G | -    | -                | -               | 0.81              | 1.20 (1.13-1.27)  | 1.20E-10 |
| rs1333049  | 9 | 22115503  | <i>CDKN2A/B</i>  | C | G | 0.50 | 1.14 (1.01-1.30) | <b>4.20E-03</b> | -                 | -                 | -        |
| rs7041847  | 9 | 4277466   | <i>GLIS3</i>     | G | A | 0.57 | 1.04 (0.91-1.20) | 5.41E-01        | 0.59 <sup>ϕ</sup> | 1.10 (1.07-1.13)  | 1.99E-14 |

SUPPLEMENTARY DATA

|            |    |           |                    |   |   |      |                  |                             |                   |                  |          |
|------------|----|-----------|--------------------|---|---|------|------------------|-----------------------------|-------------------|------------------|----------|
| rs17584499 | 9  | 8869118   | <i>PTPRD</i>       | C | T | 0.28 | 1.09 (0.94-1.26) | 2.72E-01                    | 0.25 <sup>ψ</sup> | 1.57 (1.36-1.82) | 9.00E-10 |
| rs12779790 | 10 | 12368016  | <i>CDC123</i>      | A | G | 0.13 | 1.27 (1.02-1.57) | 3.10E-02                    | 0.23              | 1.11 (1.07-1.14) | 1.00E-10 |
| rs5015480  | 10 | 94455539  | <i>HHEX</i>        | T | C | 0.45 | 1.12 (0.98-1.28) | 8.82E-02                    | 0.57              | 1.18 (1.13-1.23) | 1.30E-15 |
| rs7903146  | 10 | 114748339 | <i>TCF7L2</i>      | C | T | 0.36 | 1.37 (1.20-1.57) | <b>5.36E-06<sup>‡</sup></b> | 0.25              | 1.40 (1.34-1.46) | 2.20E-51 |
| rs1802295  | 10 | 70601480  | <i>VPS26A</i>      | G | A | 0.34 | 1.09 (0.95-1.24) | 2.13E-01                    | 0.26 <sup>‡</sup> | 1.08 (1.05-1.12) | 4.10E-08 |
| rs5215     | 11 | 17365206  | <i>KCNJ11</i>      | T | C | 0.37 | 1.00 (0.87-1.15) | 9.74E-01                    | 0.41              | 1.14 (1.10-1.19) | 5.00E-11 |
| rs163182   | 11 | 2844216   | <i>KCNQ1</i>       | G | C | -    | -                | -                           | 0.40 <sup>ψ</sup> | 1.28 (NR)        | 2.00E-17 |
| rs163184   | 11 | 2803645   | <i>KCNQ1</i>       | T | G | 0.54 | 1.11 (0.97-1.27) | 1.26E-01                    | 0.44              | 1.09 (1.04-1.13) | 6.80E-05 |
| rs231362   | 11 | 2648047   | <i>KCNQ1</i>       | A | G | 0.77 | 1.21 (1.06-1.37) | <b>4.00E-03</b>             | 0.52              | 1.08 (1.06-1.10) | 3.00E-13 |
| rs1387153  | 11 | 92313476  | <i>MTNR1B</i>      | C | T | 0.36 | 1.07 (0.93-1.23) | 3.63E-01                    | 0.28              | 1.12 (1.07-1.17) | 1.00E-06 |
| rs7957197  | 12 | 119923406 | <i>HNF1A</i>       | A | T | -    | -                | -                           | 0.85              | 1.07 (1.05-1.10) | 2.00E-08 |
| rs2245407  | 12 | 119908381 | <i>HNF1A</i>       | A | C | 0.87 | 1.05 (0.86-1.28) | 6.50E-01                    | -                 | -                | -        |
| rs7961581  | 12 | 69949369  | <i>TSPAN8/LGR5</i> | T | C | 0.35 | 1.29 (0.98-1.70) | 6.70E-02                    | 0.27              | 1.09 (1.06-1.12) | 1.10E-09 |
| rs2028299  | 15 | 88175261  | <i>AP3S2</i>       | A | C | 0.28 | 1.05 (0.91-1.22) | 4.92E-01                    | 0.31 <sup>‡</sup> | 1.10 (1.07-1.13) | 1.90E-11 |
| rs7172432  | 15 | 62396389  | <i>C2CD4A/B</i>    | G | A | -    | -                | -                           | 0.58*             | 1.14 (1.09-1.20) | 7.48E-08 |
| rs7172432  | 15 | 60183681  | <i>C2CD4A/B</i>    | G | A | 0.62 | 1.06 (0.92-1.22) | 4.15E-01                    | 0.52              | 1.07 (1.03-1.12) | 1.10E-03 |
| rs7178572  | 15 | 75534245  | <i>HMG20A</i>      | A | G | 0.54 | 1.06 (0.93-1.21) | 3.90E-01                    | 0.52 <sup>‡</sup> | 1.09 (1.06-1.12) | 7.10E-11 |
| rs8042680  | 15 | 89322341  | <i>PRC1</i>        | C | A | 0.61 | 1.10 (0.96-1.26) | 1.59E-01                    | 0.22              | 1.07 (1.05-1.09) | 2.00E-10 |
| rs8050136  | 16 | 52373776  | <i>FTO</i>         | C | A | 0.35 | 1.19 (1.04-1.37) | 1.26E-02                    | 0.38              | 1.17 (1.12-1.22) | 1.30E-12 |

SUPPLEMENTARY DATA

|            |    |           |                                |   |   |      |                  |          |                   |                  |          |
|------------|----|-----------|--------------------------------|---|---|------|------------------|----------|-------------------|------------------|----------|
| rs11642841 | 16 | 52402988  | <i>FTO</i>                     | C | A | -    | -                | -        | 0.45              | 1.13 (1.08-1.18) | 3.40E-08 |
| rs9939609  | 16 | 52378028  | <i>FTO</i>                     | T | A | 0.31 | 1.31 (1.09-1.59) | 5.00E-03 | 0.17 <sup>‡</sup> | 1.15 (1.09-1.21) | 5.50E-08 |
| rs17797882 | 16 | 77964419  | <i>WWOX</i>                    | C | T | -    | -                | -        | 0.20 <sup>ϕ</sup> | 1.08 (1.05-1.12) | 9.49E-07 |
| rs2287972  | 16 | 76701108  | <i>WWOX</i>                    | A | G | 0.44 | 1.13 (0.99-1.29) | 6.44E-02 | -                 | -                | -        |
| rs391300   | 17 | 2163008   | <i>SRR</i>                     | T | C | 0.54 | 1.02 (0.90-1.17) | 7.33E-01 | 0.64 <sup>ψ</sup> | 1.28 (1.18-1.39) | 3.00E-09 |
| rs6017317  | 20 | 42380380  | <i>FITM2-R3HDML-<br/>HNF4A</i> | T | G | -    | -                | -        | 0.45 <sup>ϕ</sup> | 1.09 (1.07-1.12) | 1.12E-11 |
| rs4812829  | 20 | 42422681  | <i>HNF4A</i>                   | G | A | 0.25 | 1.18 (1.01-1.37) | 3.67E-02 | 0.19 <sup>‡</sup> | 1.09 (1.06-1.12) | 2.60E-10 |
| rs5945326  | X  | 152553116 | <i>DUSP9</i>                   | G | A | 0.65 | 1.10 (0.98-1.23) | 1.22E-01 | 0.79              | 1.27 (1.18-1.37) | 3.00E-10 |

\*Japanese Cohort, ‡ South Asian, ϕ Asian, ψ Han Chinese, † South/East Asian, ¥ p values are based on discovery and stage 3a, Chr-chromosome, Pos- position

## SUPPLEMENTARY DATA

**Supplementary Figure 1.** Principal components analysis of the Sikh GWAS population and HapMap3 founder populations GIH, CEU, CHB, JPT and YRI.

Eigenvectors demonstrate the close proximity of the Sikh GWAS population to the GIH and CEU populations, and the close matching of cases and controls

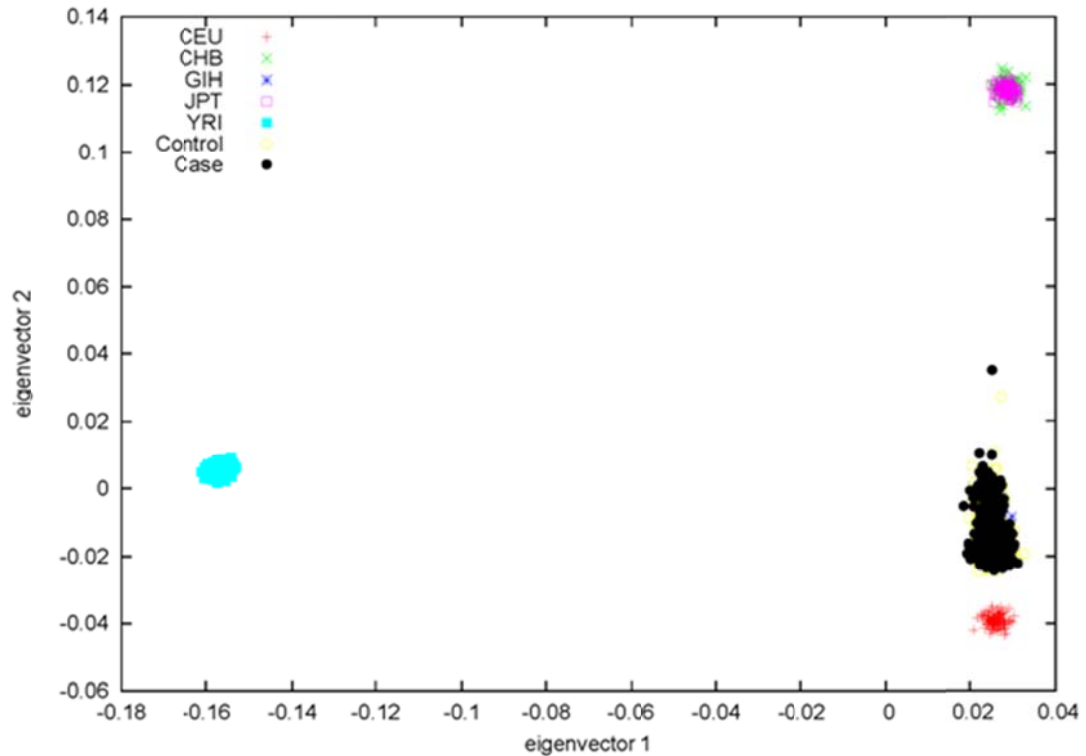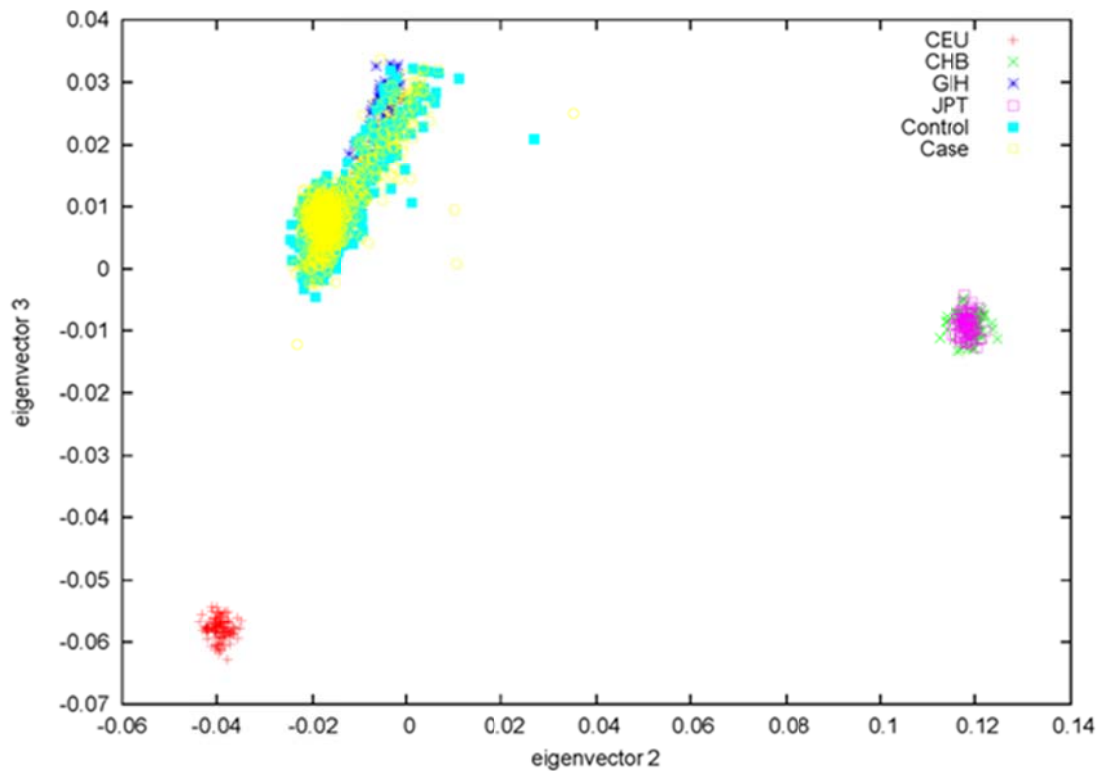

SUPPLEMENTARY DATA

**Supplementary Figure 2a.** QQ Plot of GWAS discovery results (524,216 genotyped SNPs;  $\lambda = 1.0$ )

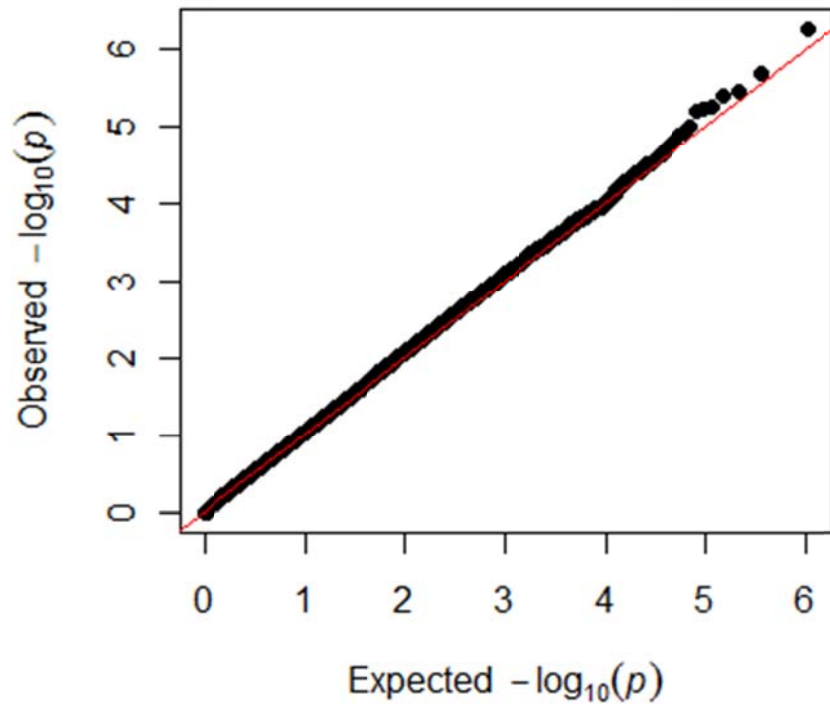

**Supplementary Figure 2b.** QQ Plot of HM3-imputed GWAS discovery results (1,232,008 SNPs;  $\lambda = 1.02$ )

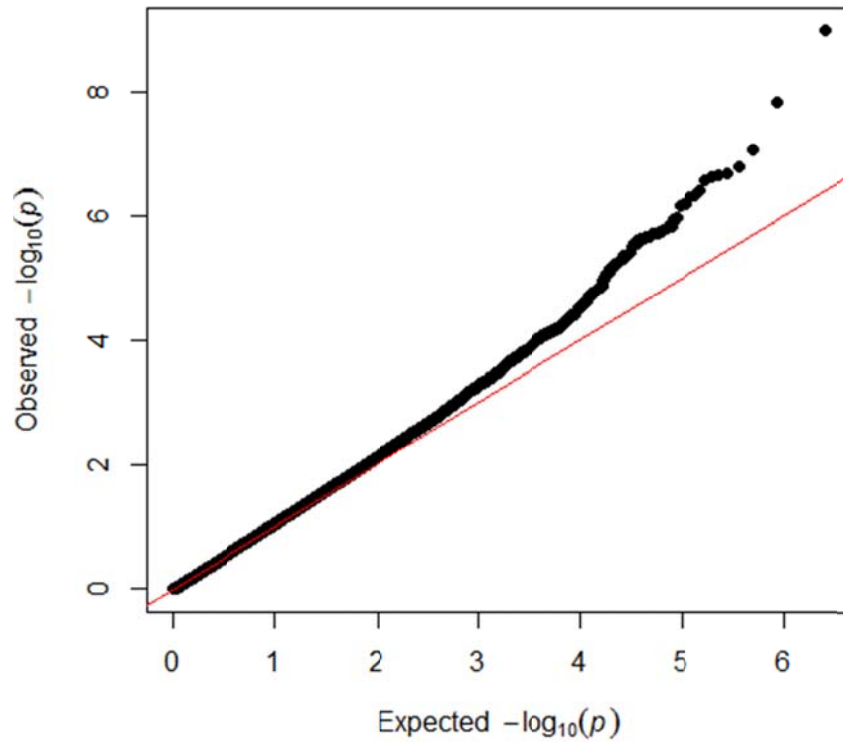

SUPPLEMENTARY DATA

**Supplementary Figure 3.** Summary of MAGIC GWAS results for glycemic traits for the *SGCG* locus and 50 kb upstream/downstream of the gene.

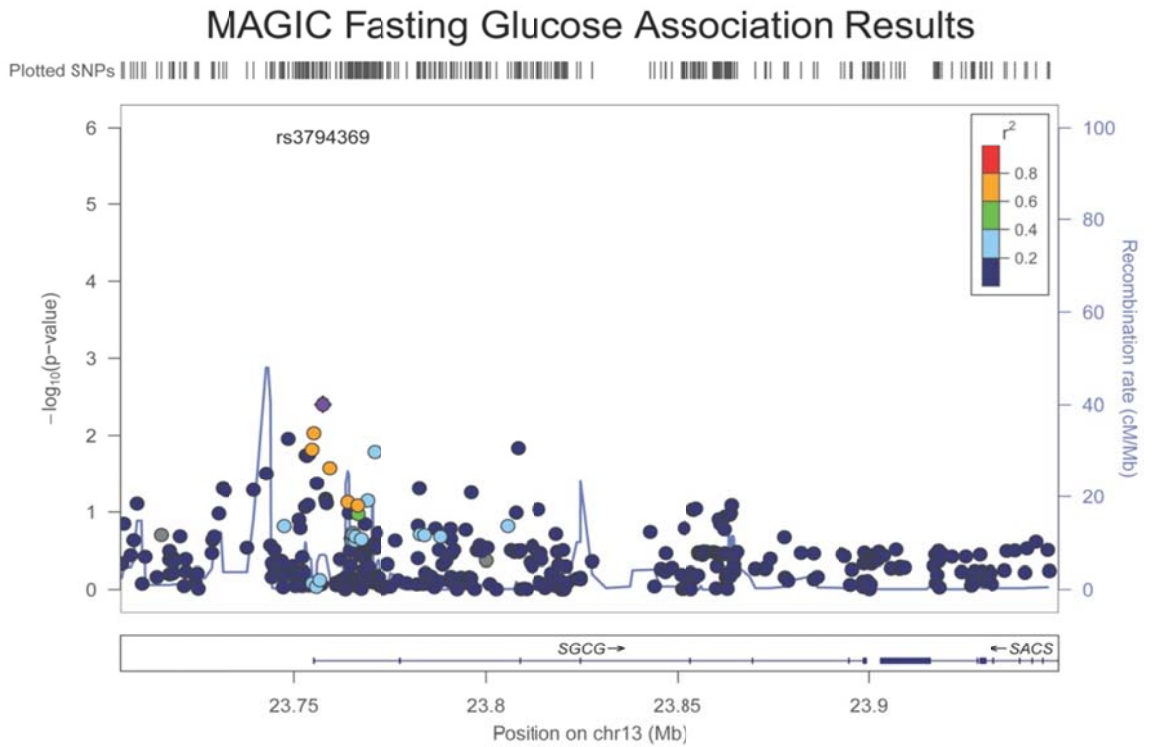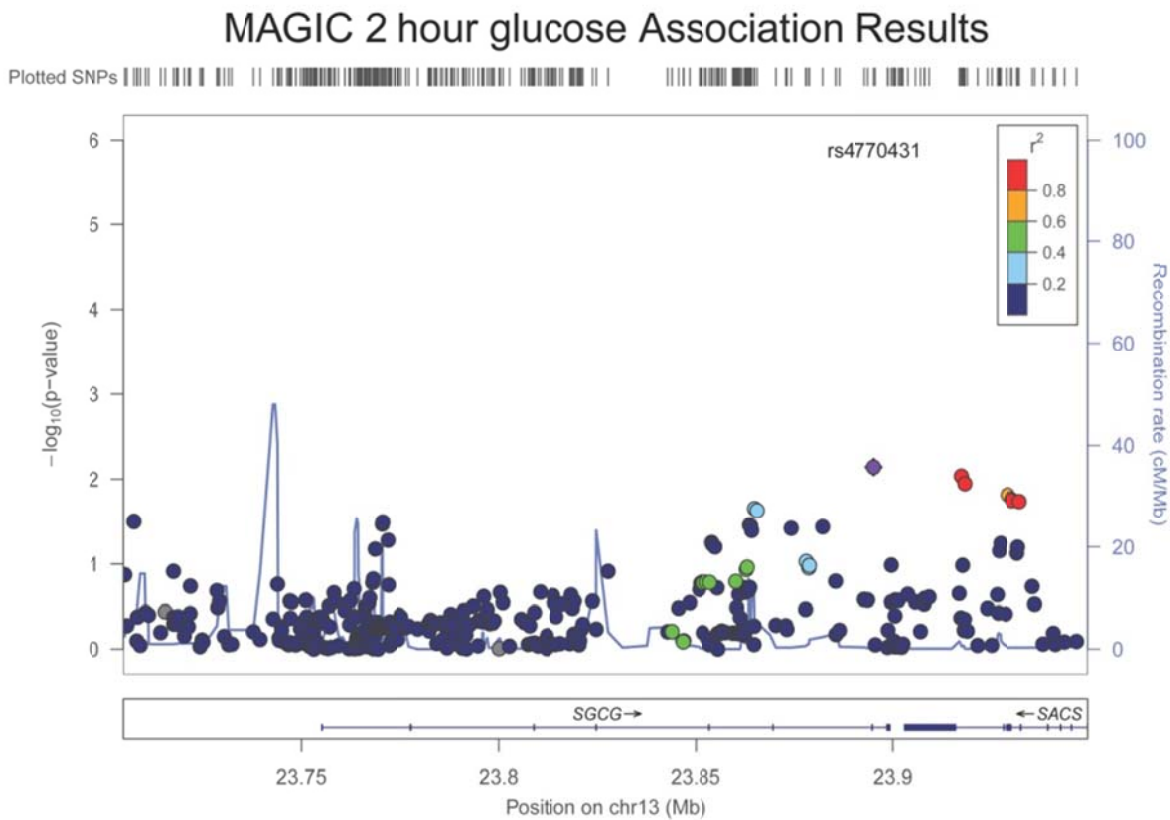

SUPPLEMENTARY DATA

**Supplementary Figure 4.** Figure 4A shows several SNPs in the *SGCG* region (~638Kb) at chromosome 13q12 to be associated with significantly elevated expression of *SGCG* mRNA ( $P_{eQTL} < 10^{-4}$ ) in adipose tissues from the data from MuTHER Consortium. Log  $P$  values of cis-expression adipose eQTL are shown on Y axis and SNPs in the *SGCG* on X axis. Note that the lead variant (rs9552911) was absent in both MuTHER data and in Caucasian HapMap. Figure 4B shows linkage disequilibrium (LD) maps of the *SGCG* SNPs from the MuTHER study showing patterns of variation in pair-wise LD between Punjabi Sikhs, Gujarati Indians (GIH), Caucasians (CEU), Africans (YRI), and Japanese (JPT) taken from Hap Map. The strongest LD ( $r^2=0.26$ ) with rs9552911 was observed in two (rs12864851 and rs7328432) in Japanese HapMap.

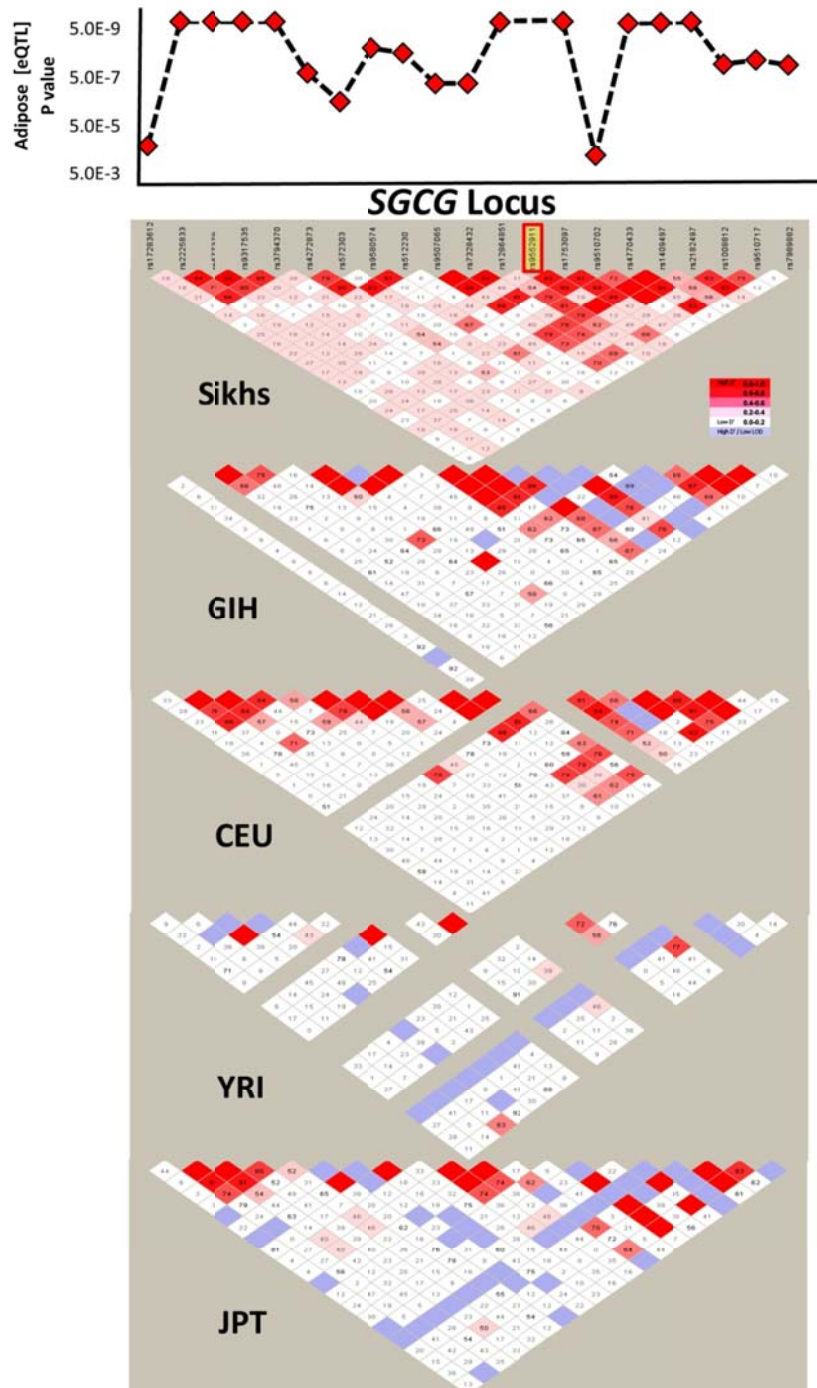

SUPPLEMENTARY DATA

**Supplementary Figure 5.** Comparative Genomic Analysis showing evolution of Index SNP(rs9552911) in the SGC.

| Species    | rs9552911                      |
|------------|--------------------------------|
| Human      | TTATTATTAC <b>G</b> GAAGTTATTG |
| Chimpanzee | TTATTATTAC <b>G</b> GAAGTTATTG |
| Gorilla    | TTATTATTAC <b>G</b> GAAGTTATTG |
| Macaque    | TTATTATTAT <b>G</b> GAAGCCGTTG |
| Kupal      | TTACCATCAT <b>A</b> GAGATCATTG |
| Galagos    | TTATCATCAC <b>A</b> TAGGTCATTG |
| Guinea Pig | TGACCATCAT <b>G</b> GGTGCAGTTG |
| Squirrel   | ATGTCATCAT <b>G</b> GAAGTCACTG |
| Rabbit     | -CACCATAAT <b>G</b> GAGCCCATTG |
| Bat        | TTATTATCAT <b>G</b> GAGGTCATTA |
| Flying Fox | TTATCATCAT <b>G</b> GAGGTCATTA |
| Sloth      | TTCTCATCAT <b>G</b> AAGATAATTA |
| Elephant   | TTATTGTCAT <b>A</b> AAGATAATTG |



**References**

- [1] Sanghera DK, Bhatti JS, Bhatti GK, et al. (2006) The Khatri Sikh Diabetes Study (SDS): study design, methodology, sample collection, and initial results. *Hum Biol* 78: 43-63
- [2] Been LF, Ralhan S, Wander GS, et al. Variants in KCNQ1 increase type II diabetes susceptibility in South Asians: a study of 3,310 subjects from India and the US. *BMC Med Genet* 12: 18
- [3] (2004) Diagnosis and classification of diabetes mellitus. *Diabetes Care* 27 Suppl 1: S5-S10
- [4] Chambers JC, Zhao J, Terracciano CM, et al. Genetic variation in SCN10A influences cardiac conduction. *Nat Genet* 42: 149-152
- [5] Saleheen D, Zaidi M, Rasheed A, et al. (2009) The Pakistan Risk of Myocardial Infarction Study: a resource for the study of genetic, lifestyle and other determinants of myocardial infarction in South Asia. *Eur J Epidemiol* 24: 329-338
- [6] Lavanya R, Jeganathan VS, Zheng Y, et al. (2009) Methodology of the Singapore Indian Chinese Cohort (SICC) eye study: quantifying ethnic variations in the epidemiology of eye diseases in Asians. *Ophthalmic Epidemiol* 16: 325-336
- [7] Chidambaram M, Radha V, Mohan V Replication of recently described T2D gene variants in a South Indian population. *Metabolism* 59: 1760-1766
- [8] Rees SD, Islam M, Hydrie MZ, et al. (2011) An FTO variant is associated with T2D in South Asian populations after accounting for body mass index and waist circumference. *Diabetic medicine : a journal of the British Diabetic Association* 28: 673-680
- [9] Bellary S, O'Hare JP, Raymond NT, et al. (2008) Enhanced diabetes care to patients of south Asian ethnic origin (the United Kingdom Asian Diabetes Study): a cluster randomised controlled trial. *Lancet* 371: 1769-1776
- [10] Katulanda P, Shine B, Katulanda GW, et al. (2008) Diabetes mellitus among young adults in Sri Lanka--role of GAD antibodies in classification and treatment: the Sri Lanka Young Diabetes study. *Diabetologia* 51: 1368-1374
- [11] Katulanda P, Constantine GR, Mahesh JG, et al. (2008) Prevalence and projections of diabetes and pre-diabetes in adults in Sri Lanka--Sri Lanka Diabetes, Cardiovascular Study (SLDCS). *Diabet Med* 25: 1062-1069
- [12] Imamura M, Maeda S, Yamauchi T, et al. A single-nucleotide polymorphism in ANK1 is associated with susceptibility to T2D in Japanese populations. *Hum Mol Genet* 21: 3042-3049
- [13] Ohshige T, Iwata M, Omori S, et al. Association of new loci identified in European genome-wide association studies with susceptibility to T2D in the Japanese. *PLoS One* 6: e26911
- [14] Sim X, Ong RT, Suo C, et al. Transferability of T2D implicated loci in multi-ethnic cohorts from Southeast Asia. *PLoS Genet* 7: e1001363
- [15] Nang EE, Khoo CM, Tai ES, et al. (2009) Is there a clear threshold for fasting plasma glucose that differentiates between those with and without neuropathy and chronic kidney disease?: the Singapore Prospective Study Program. *Am J Epidemiol* 169: 1454-1462
- [16] Foong AW, Saw SM, Loo JL, et al. (2007) Rationale and methodology for a population-based study of eye diseases in Malay people: The Singapore Malay eye study (SiMES). *Ophthalmic Epidemiol* 14: 25-35
- [17] Nanri A, Yoshida D, Yamaji T, Mizoue T, Takayanagi R, Kono S (2008) Dietary patterns and C-reactive protein in Japanese men and women. *Am J Clin Nutr* 87: 1488-1496

## SUPPLEMENTARY DATA

- [18] Shu XO, Long J, Cai Q, et al. Identification of new genetic risk variants for type 2 diabetes. *PLoS Genet* 6
- [19] Zheng W, Chow WH, Yang G, et al. (2005) The Shanghai Women's Health Study: rationale, study design, and baseline characteristics. *Am J Epidemiol* 162: 1123-1131
- [20] Zheng W, Long J, Gao YT, et al. (2009) Genome-wide association study identifies a new breast cancer susceptibility locus at 6q25.1. *Nat Genet* 41: 324-328
- [21] Tsai FJ, Yang CF, Chen CC, et al. A genome-wide association study identifies susceptibility variants for T2D in Han Chinese. *PLoS Genet* 6: e1000847
- [22] Kumar G, Sng BL, Kumar S (2004) Correlation of capillary and venous blood glucometry with laboratory determination. *Prehosp Emerg Care* 8: 378-383
- [23] Voight BF, Scott LJ, Steinthorsdottir V, et al. Twelve T2D susceptibility loci identified through large-scale association analysis. *Nat Genet* 42: 579-589
- [24] Cho YS, Chen CH, Hu C, et al. Meta-analysis of genome-wide association studies identifies eight new loci for T2D in East Asians. *Nat Genet* 44: 67-72
